# Supplementary material for: A regioselective [4 + 2] annulation approach to 5-acylindolizine-7-carbonitriles: generation of poly-substituted pyridines
Source: Royal Society of Chemistry journal article supplement (doi:10.1039/d1ob00788b), 2021-01-01

## Electronic Supplementary Information

### A Regioselective [4+2] Annulation Approach to 5-Acylindolizine-7-carbonitriles: Generation of Poly-substituted Pyridines

Sunmi Kim,<sup>a,‡</sup> Jeong Hwa Lee,<sup>a,‡</sup> Seok Hyun Yoon,<sup>b,‡</sup> and Ikyon Kim<sup>a,\*</sup>

<sup>a</sup> College of Pharmacy and Yonsei Institute of Pharmaceutical Sciences, Yonsei University

85 Songdogwahak-ro, Yeonsu-gu, Incheon, 21983, Republic of Korea

<sup>b</sup> Graduate Program of Industrial Pharmaceutical Sciences, Yonsei University

85 Songdogwahak-ro, Yeonsu-gu, Incheon, 21983, Republic of Korea

<sup>‡</sup>These authors contributed equally.

\* Corresponding author. Tel.: +82 32 749 4515; fax: +82 32 749 4105; e-mail:

[ikyonkim@yonsei.ac.kr](mailto:ikyonkim@yonsei.ac.kr)

## **Table of Contents**

|                                                                     |               |
|---------------------------------------------------------------------|---------------|
| Copies of $^1\text{H}$ and $^{13}\text{C}$ NMR spectra of <b>4</b>  | <b>S3-27</b>  |
| Copies of $^1\text{H}$ and $^{13}\text{C}$ NMR spectra of <b>7</b>  | <b>S28</b>    |
| Copies of $^1\text{H}$ and $^{13}\text{C}$ NMR spectra of <b>9</b>  | <b>S29</b>    |
| Copies of $^1\text{H}$ and $^{13}\text{C}$ NMR spectra of <b>10</b> | <b>S30-31</b> |
| Copies of $^1\text{H}$ and $^{13}\text{C}$ NMR spectra of <b>11</b> | <b>S32</b>    |
| Copies of $^1\text{H}$ and $^{13}\text{C}$ NMR spectra of <b>12</b> | <b>S33</b>    |

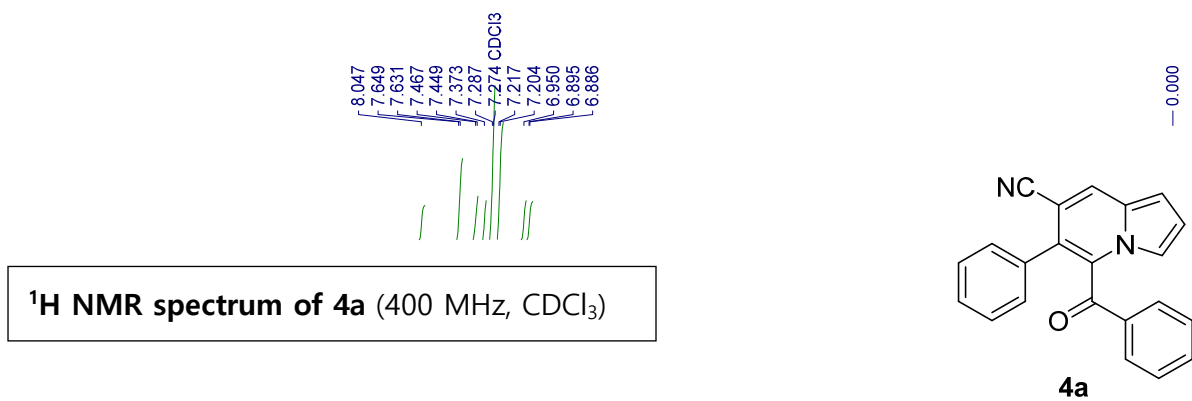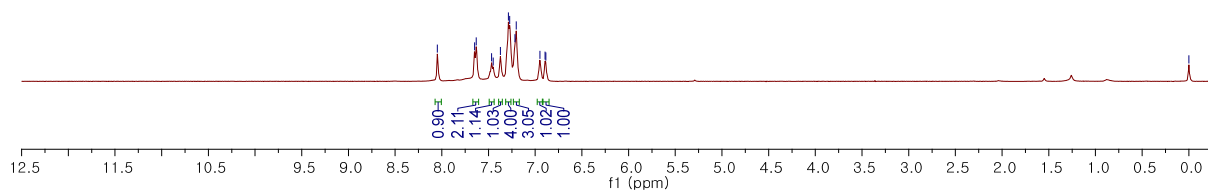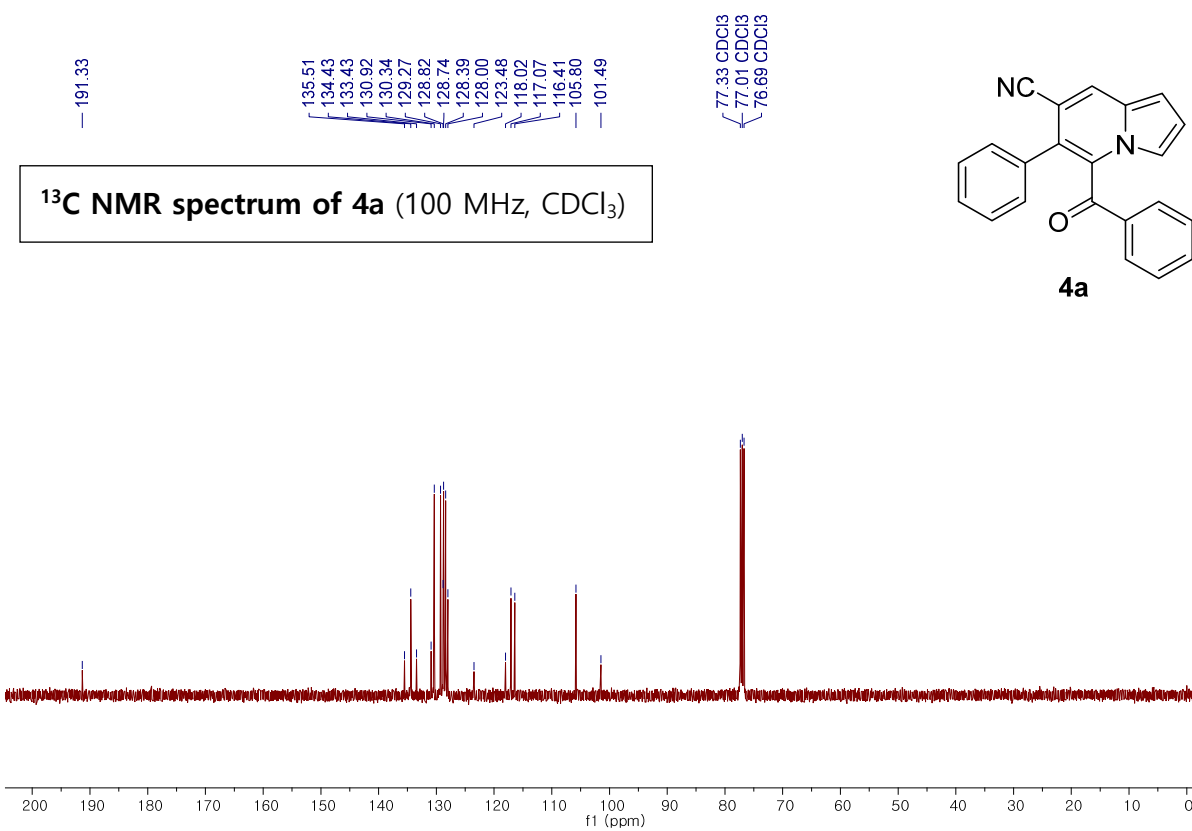

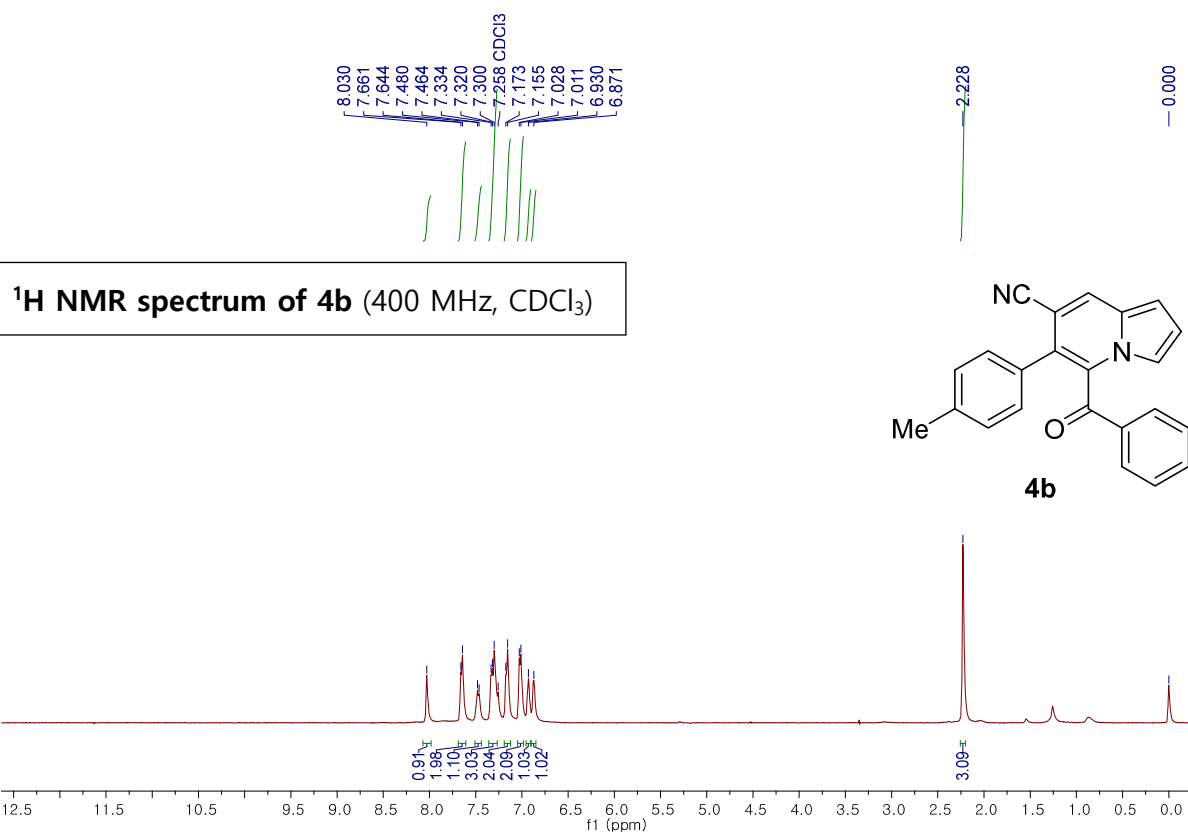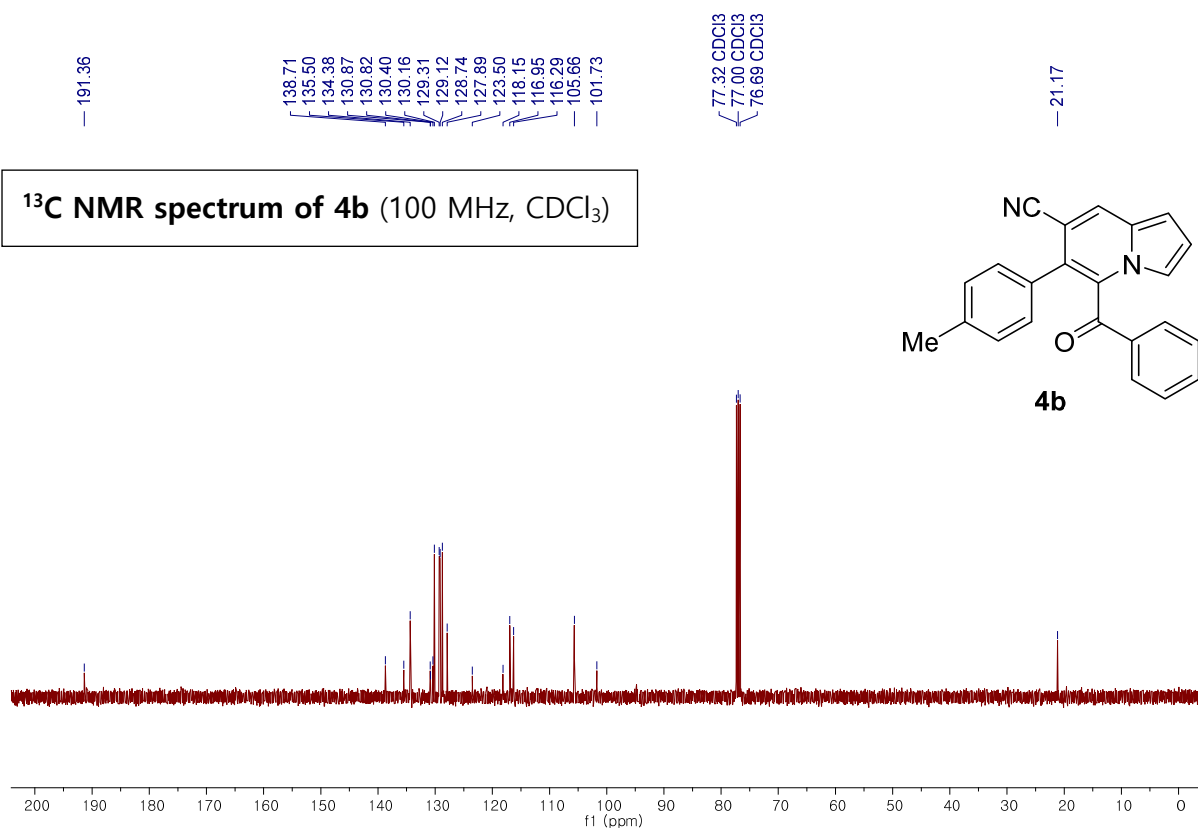

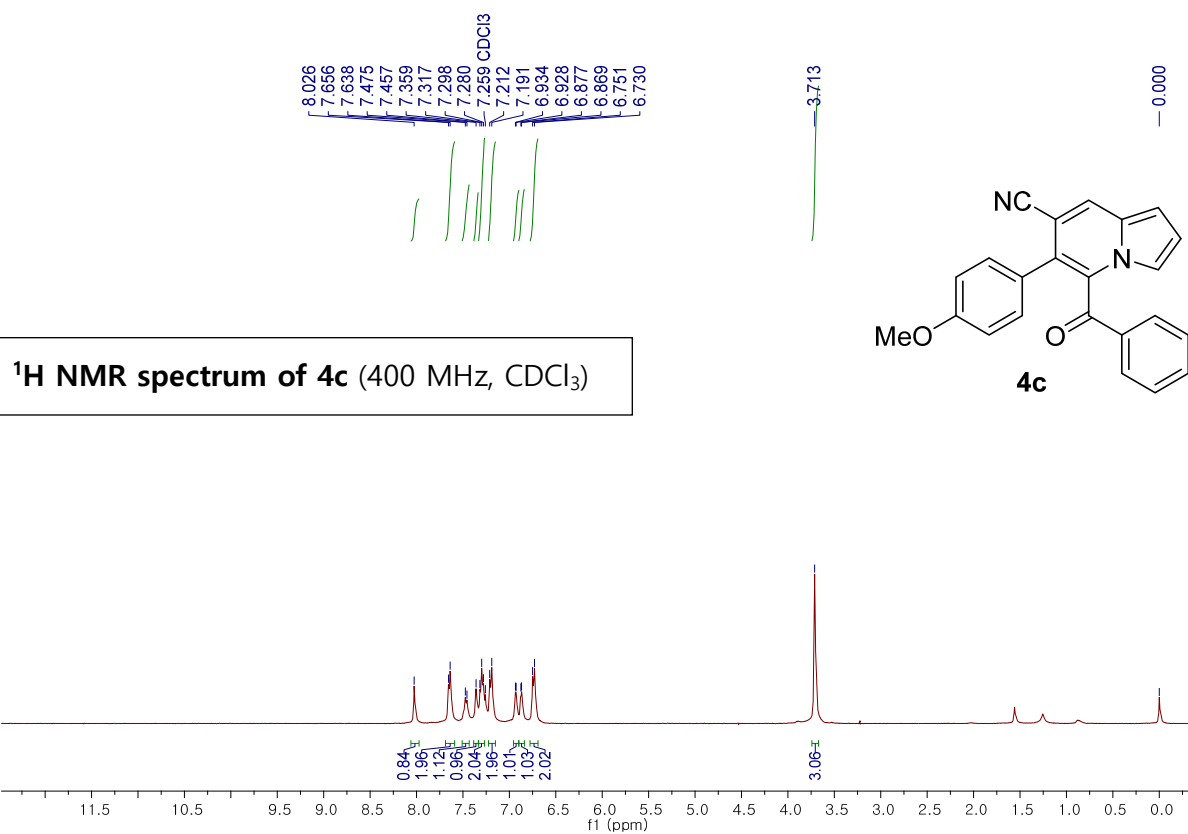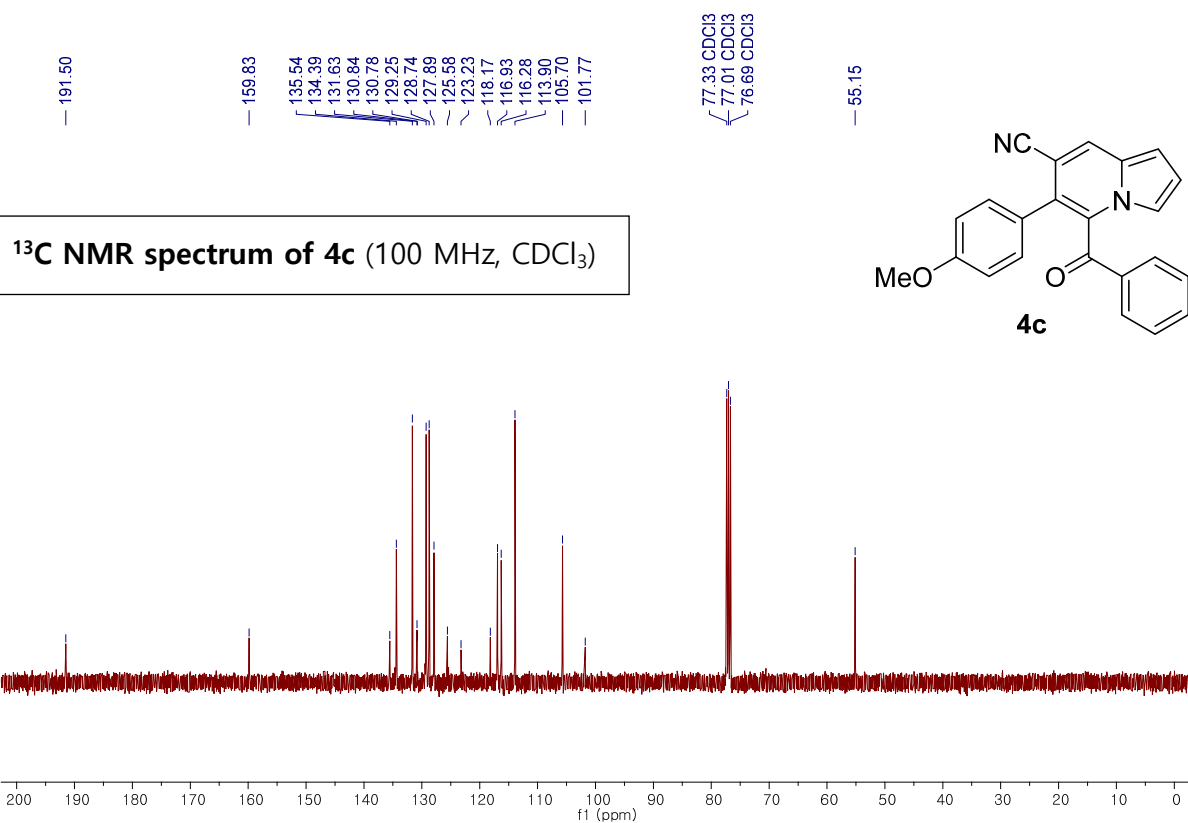

**<sup>1</sup>H NMR spectrum of 4d (400 MHz, CDCl<sub>3</sub>)**

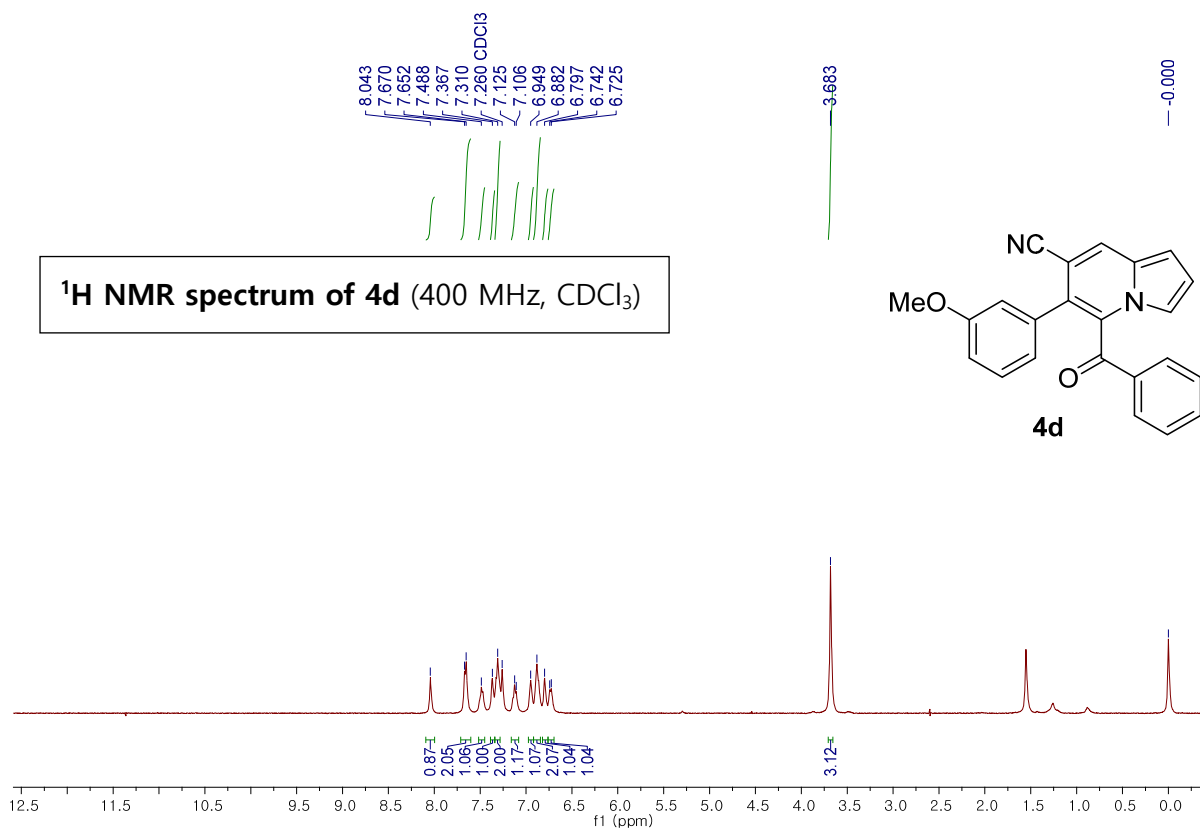

**<sup>13</sup>C NMR spectrum of 4d (100 MHz, CDCl<sub>3</sub>)**

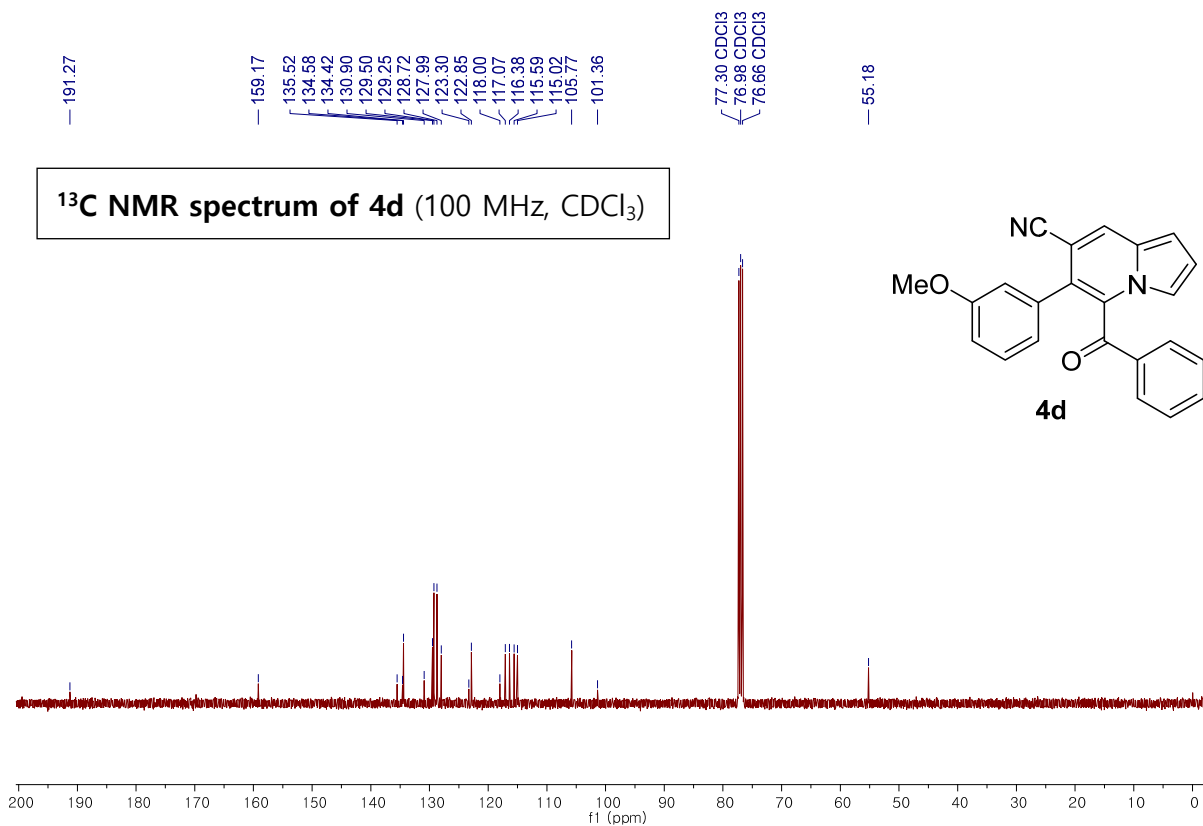

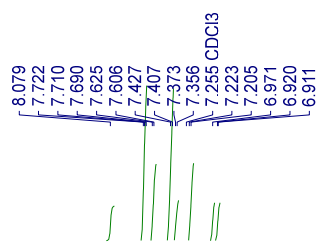

**<sup>1</sup>H NMR spectrum of 4e (400 MHz, CDCl<sub>3</sub>)**

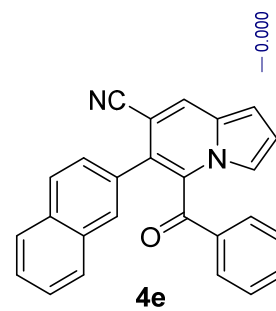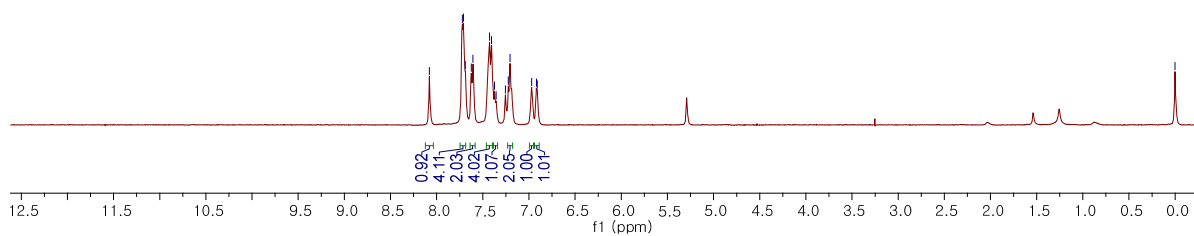

**<sup>13</sup>C NMR spectrum of 4e (100 MHz, CDCl<sub>3</sub>)**

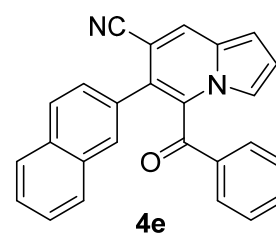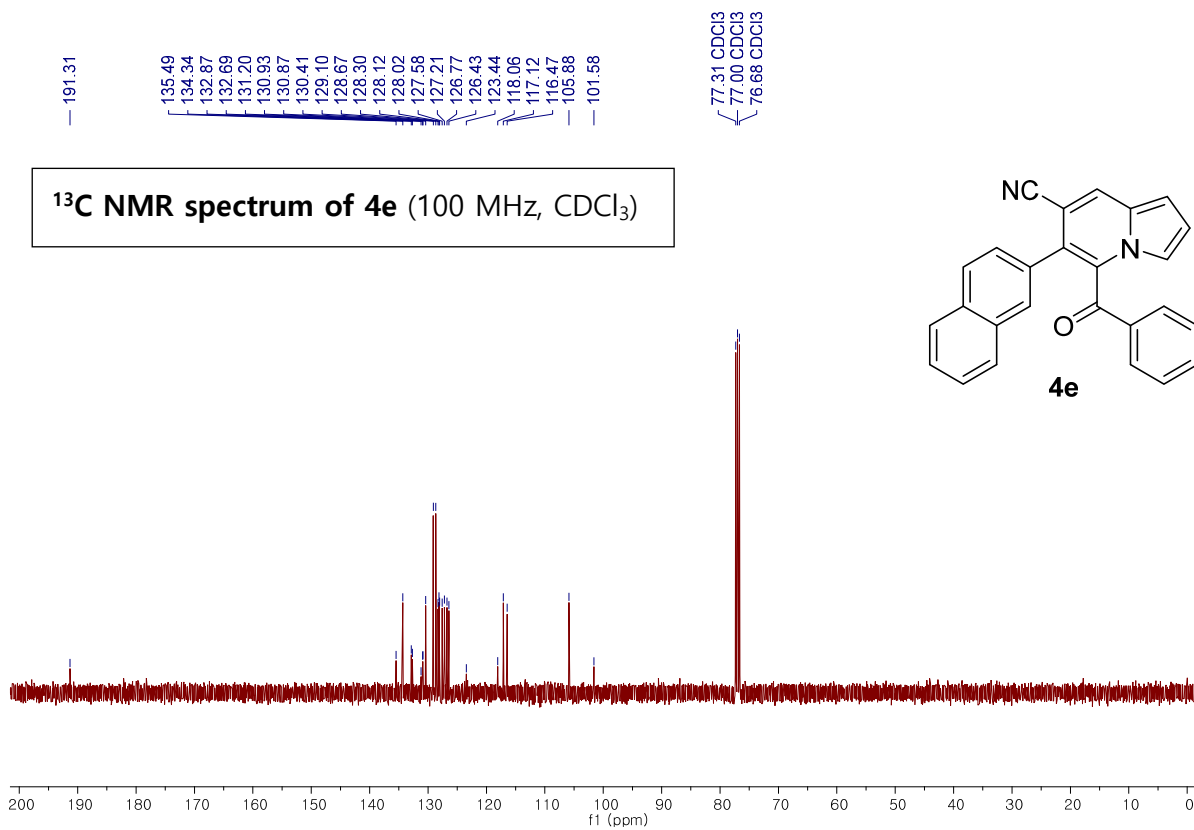

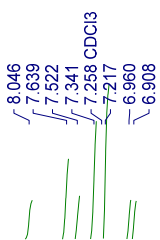

**<sup>1</sup>H NMR spectrum of 4f (400 MHz, CDCl<sub>3</sub>)**

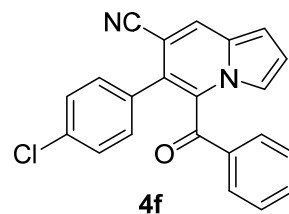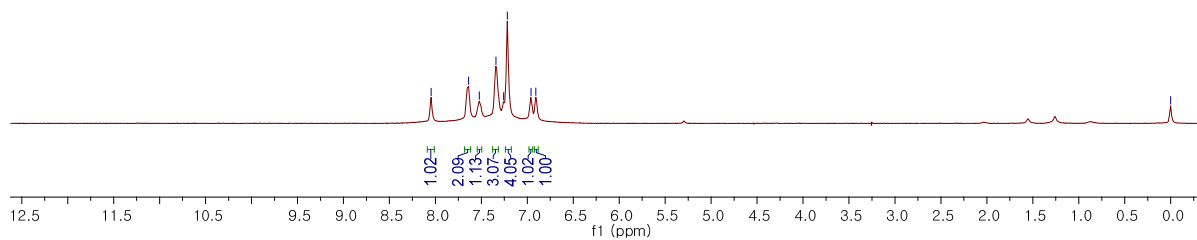

**<sup>13</sup>C NMR spectrum of 4f (100 MHz, CDCl<sub>3</sub>)**

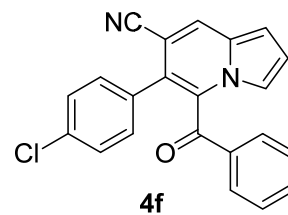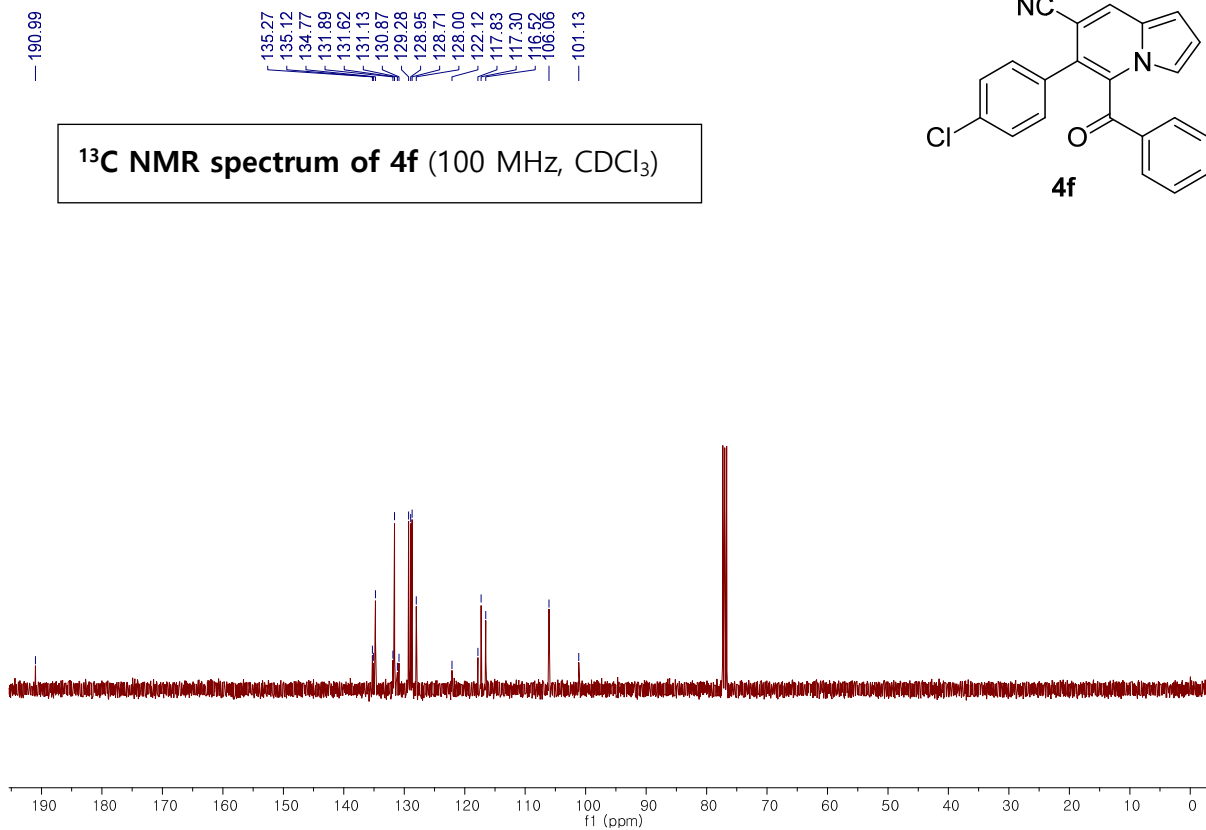



MH-I-11

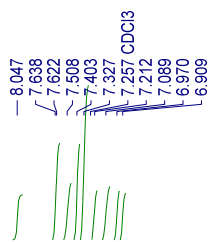

**<sup>1</sup>H NMR spectrum of 4g (400 MHz, CDCl<sub>3</sub>)**

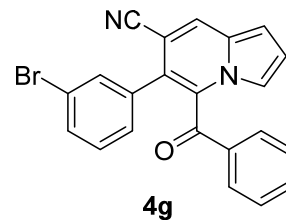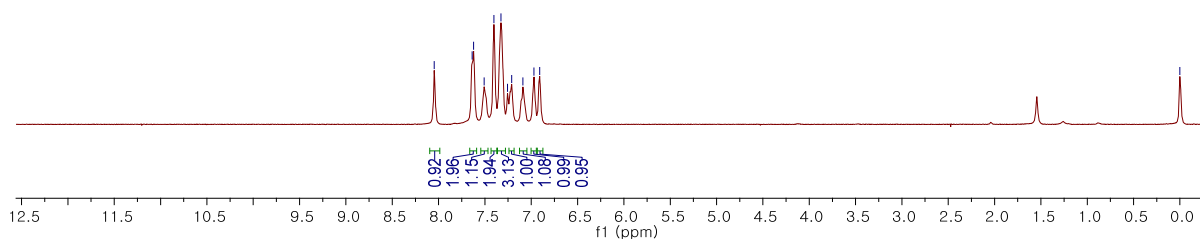

**<sup>13</sup>C NMR spectrum of 4g (100 MHz, CDCl<sub>3</sub>)**

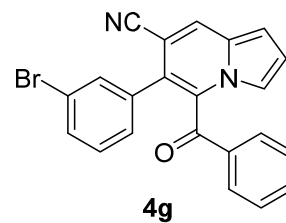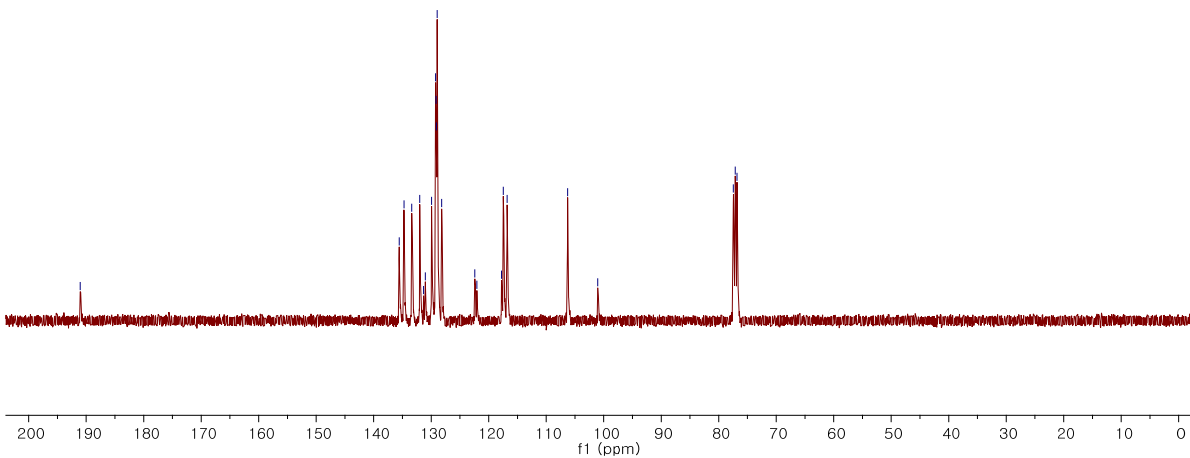

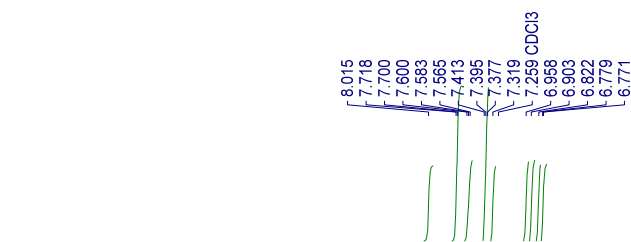

**<sup>1</sup>H NMR spectrum of 4h (400 MHz, CDCl<sub>3</sub>)**

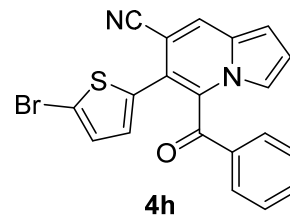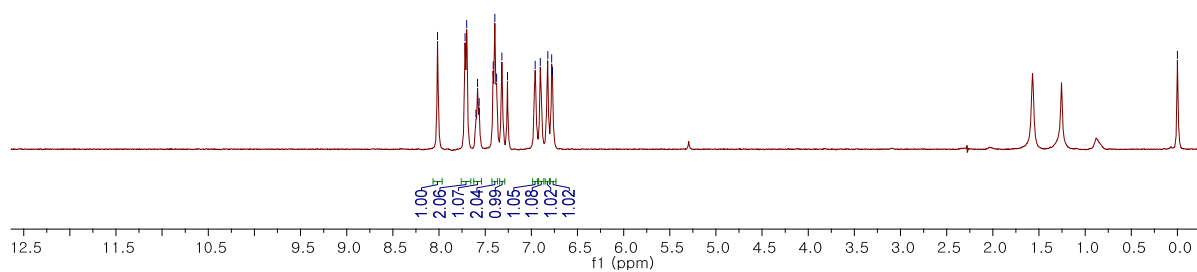

**<sup>13</sup>C NMR spectrum of 4h (100 MHz, CDCl<sub>3</sub>)**

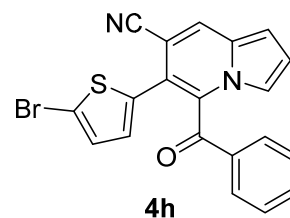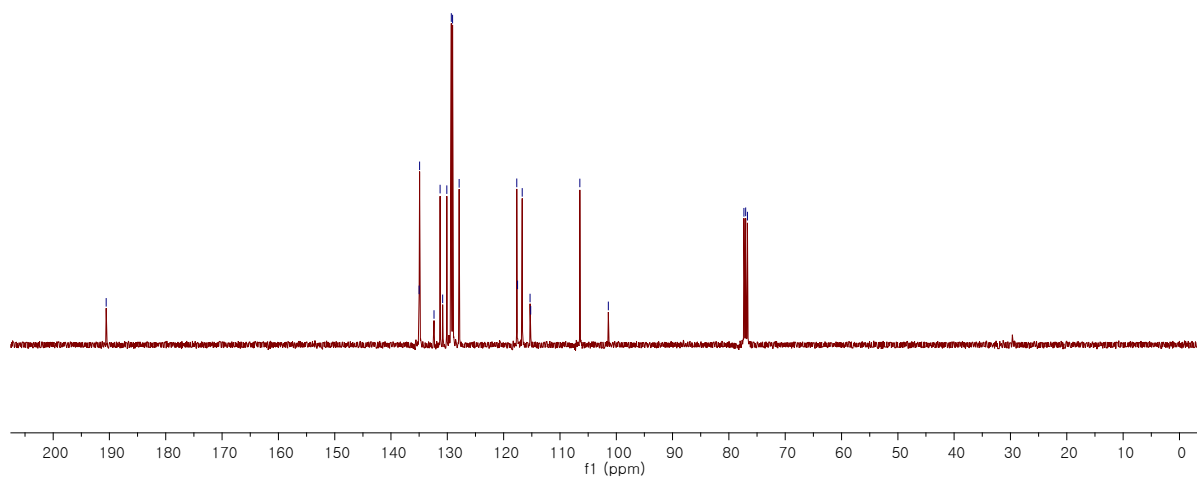

**<sup>1</sup>H NMR spectrum of 4i (400 MHz, CDCl<sub>3</sub>)**

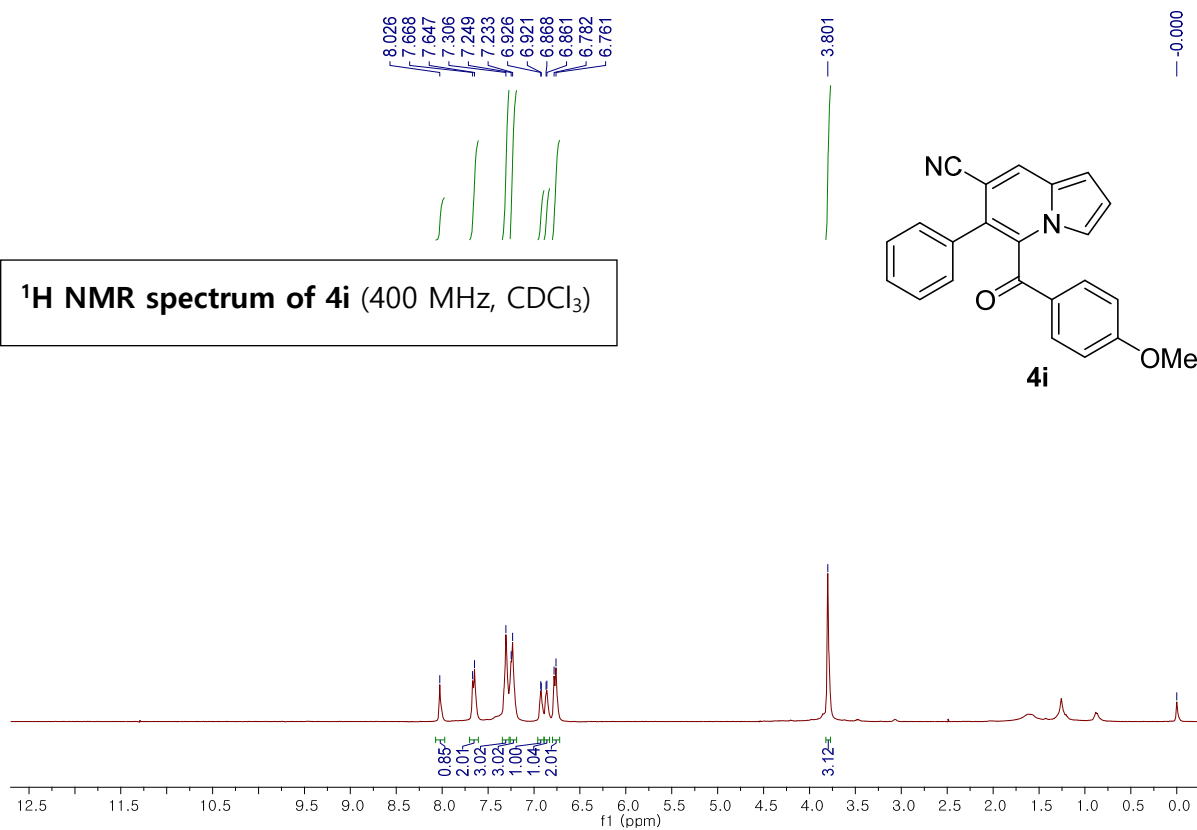

**<sup>13</sup>C NMR spectrum of 4i (100 MHz, CDCl<sub>3</sub>)**

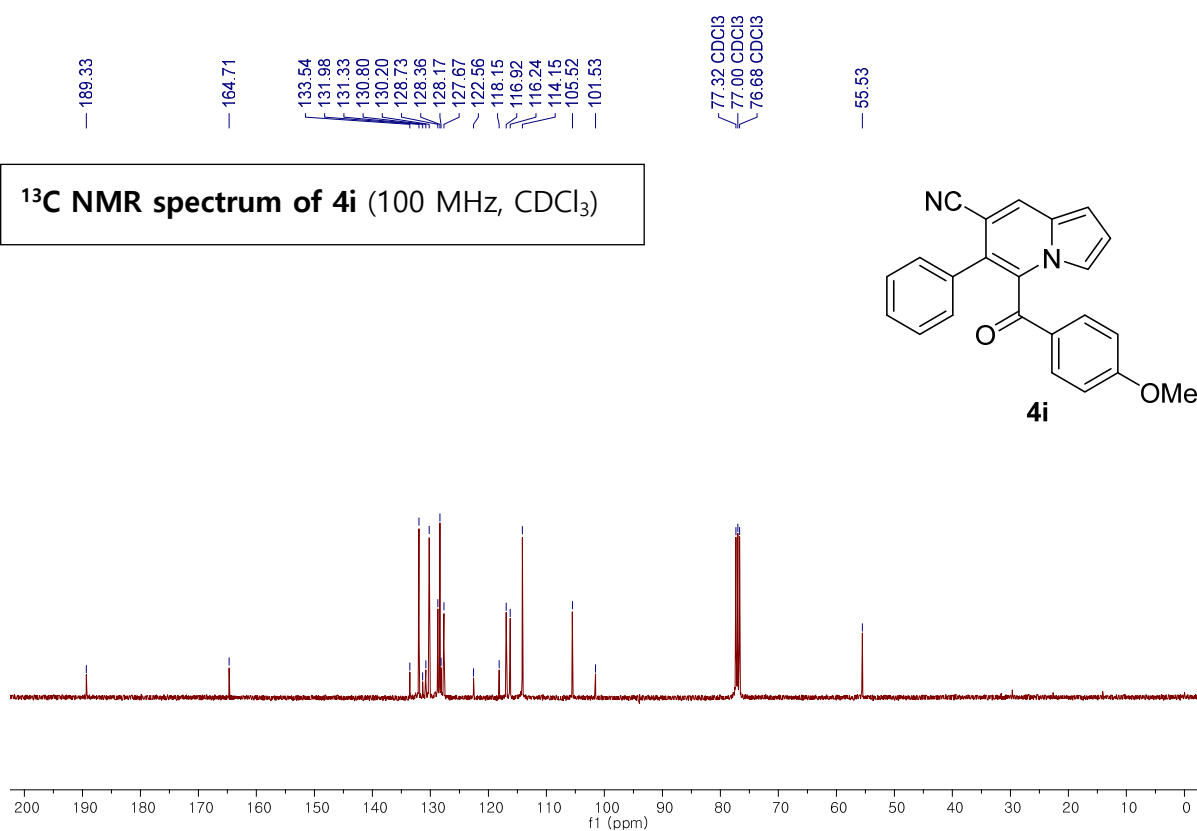

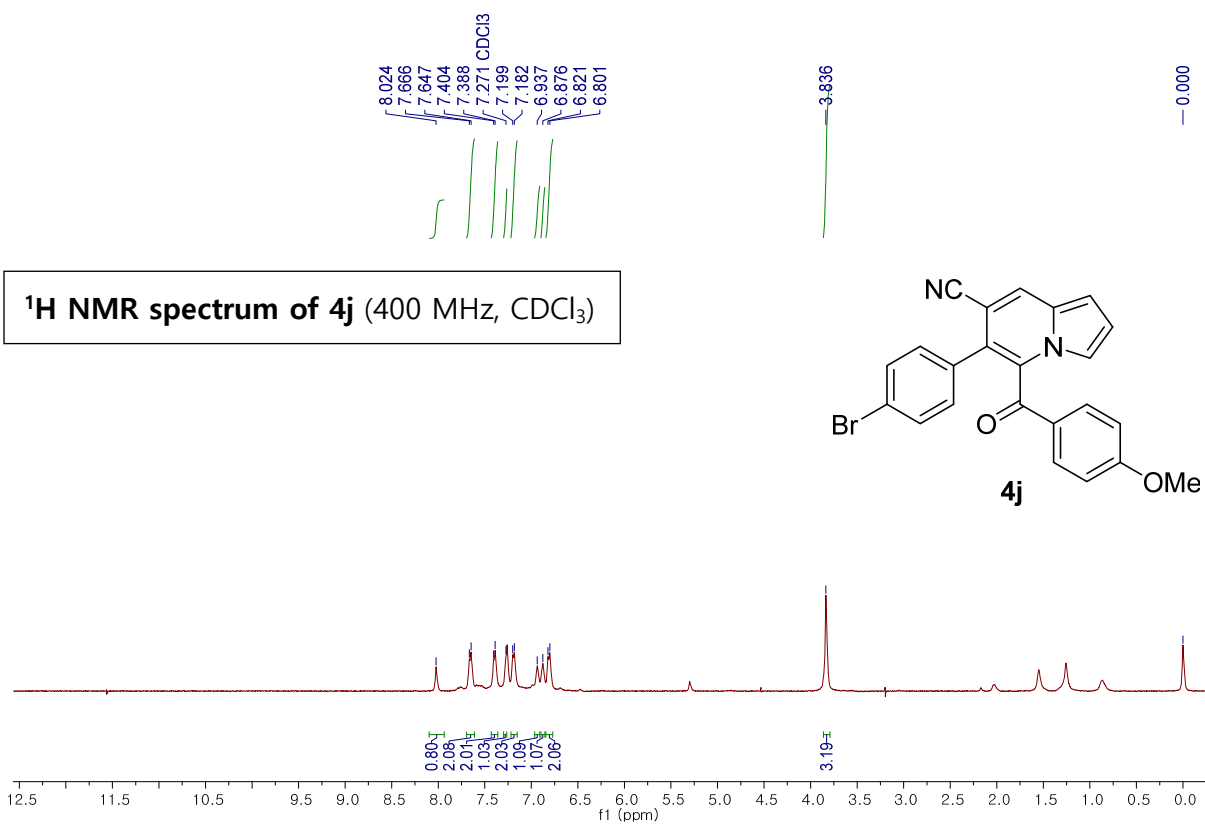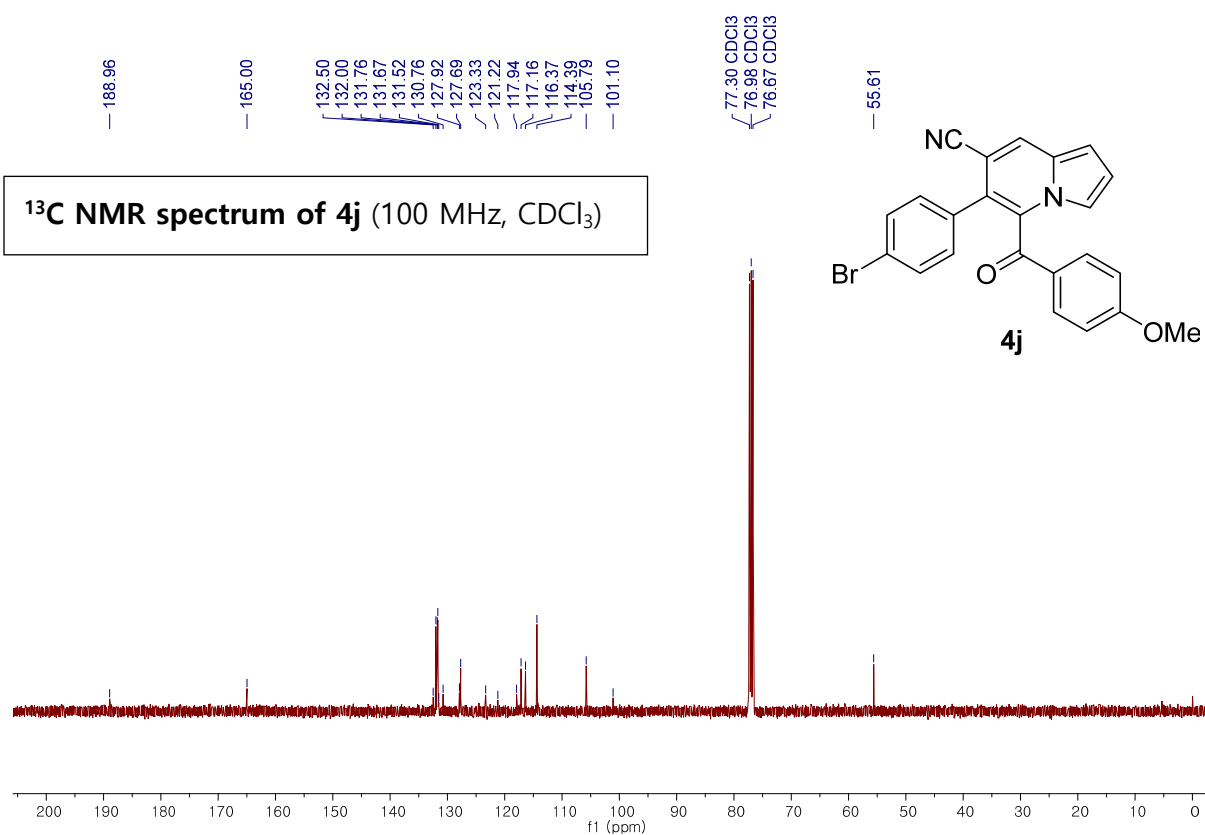

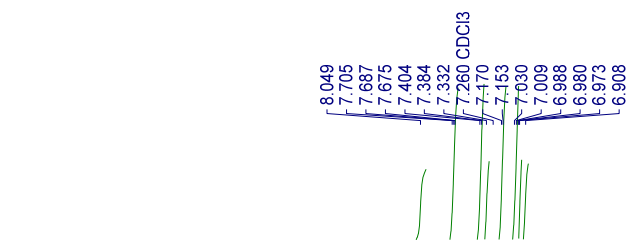

**<sup>1</sup>H NMR spectrum of 4k (400 MHz, CDCl<sub>3</sub>)**

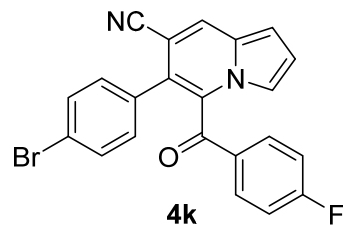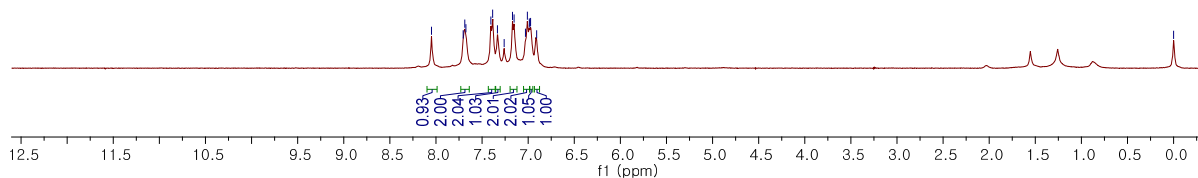

**<sup>13</sup>C NMR spectrum of 4k (100 MHz, CDCl<sub>3</sub>)**

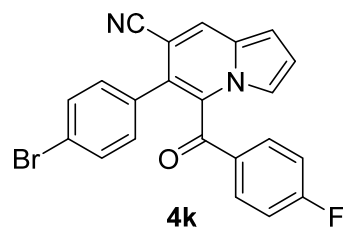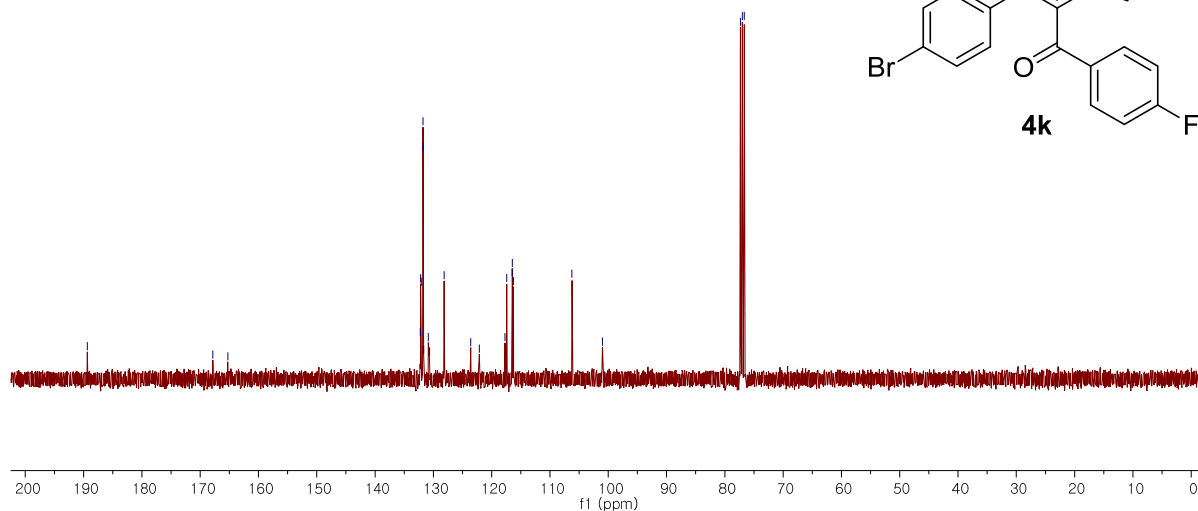

**<sup>19</sup>F NMR spectrum of 4k (376 MHz, CDCl<sub>3</sub>)**

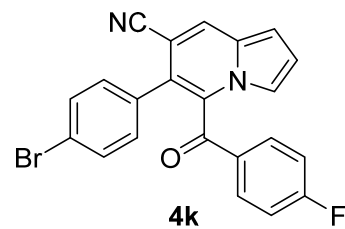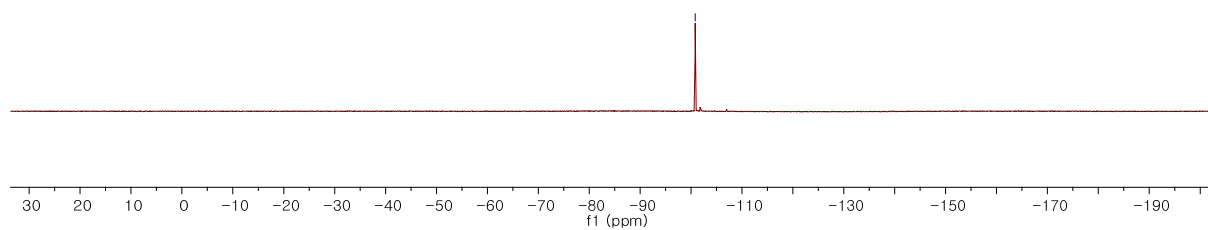

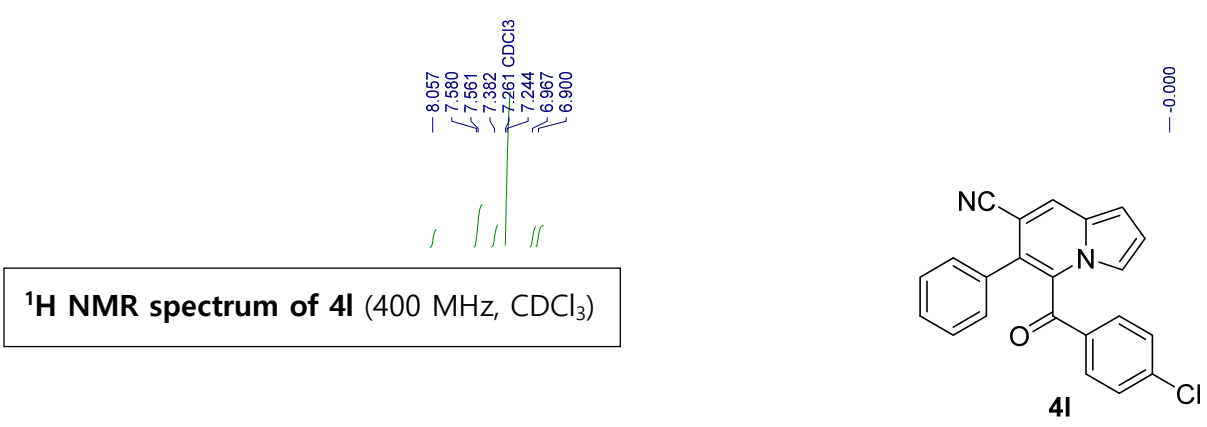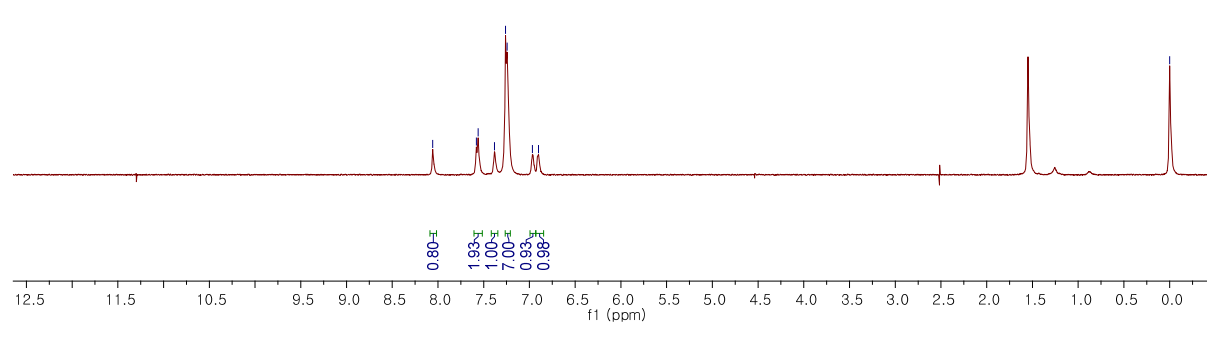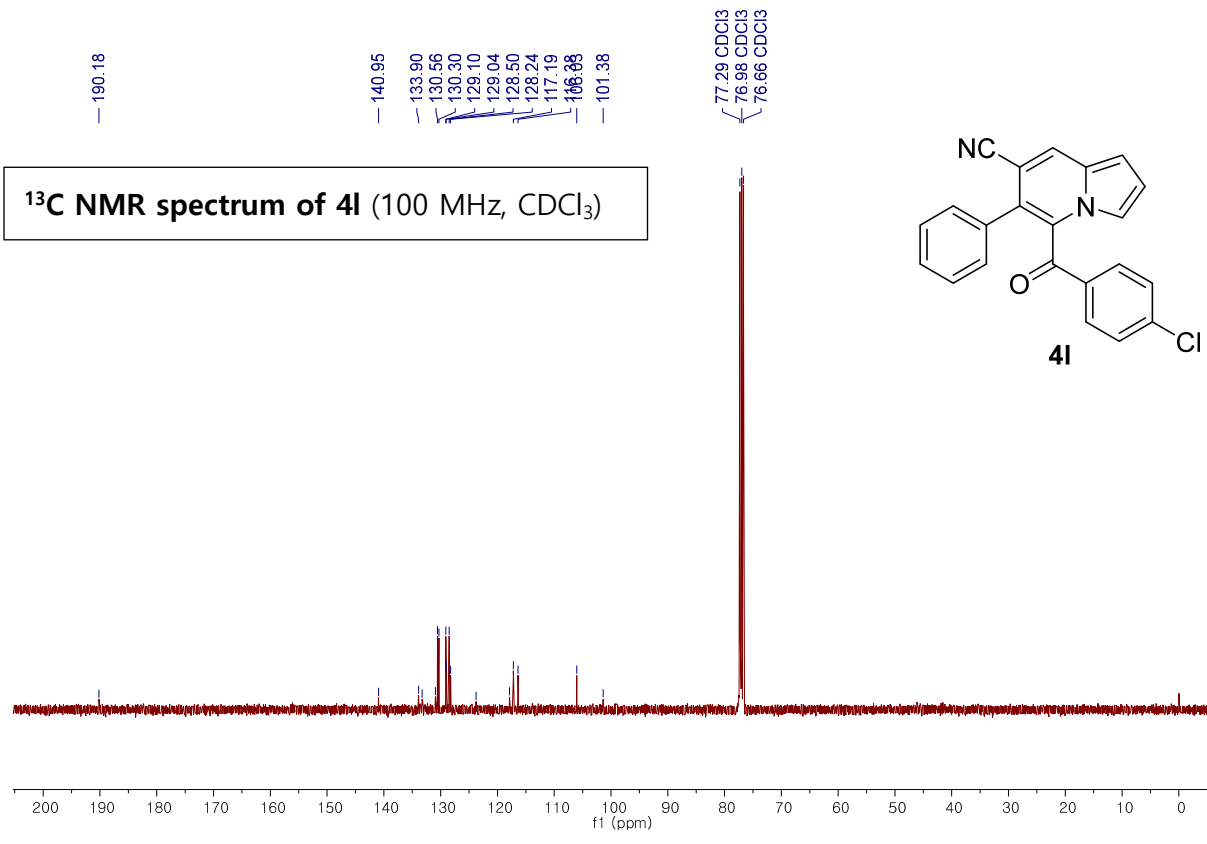

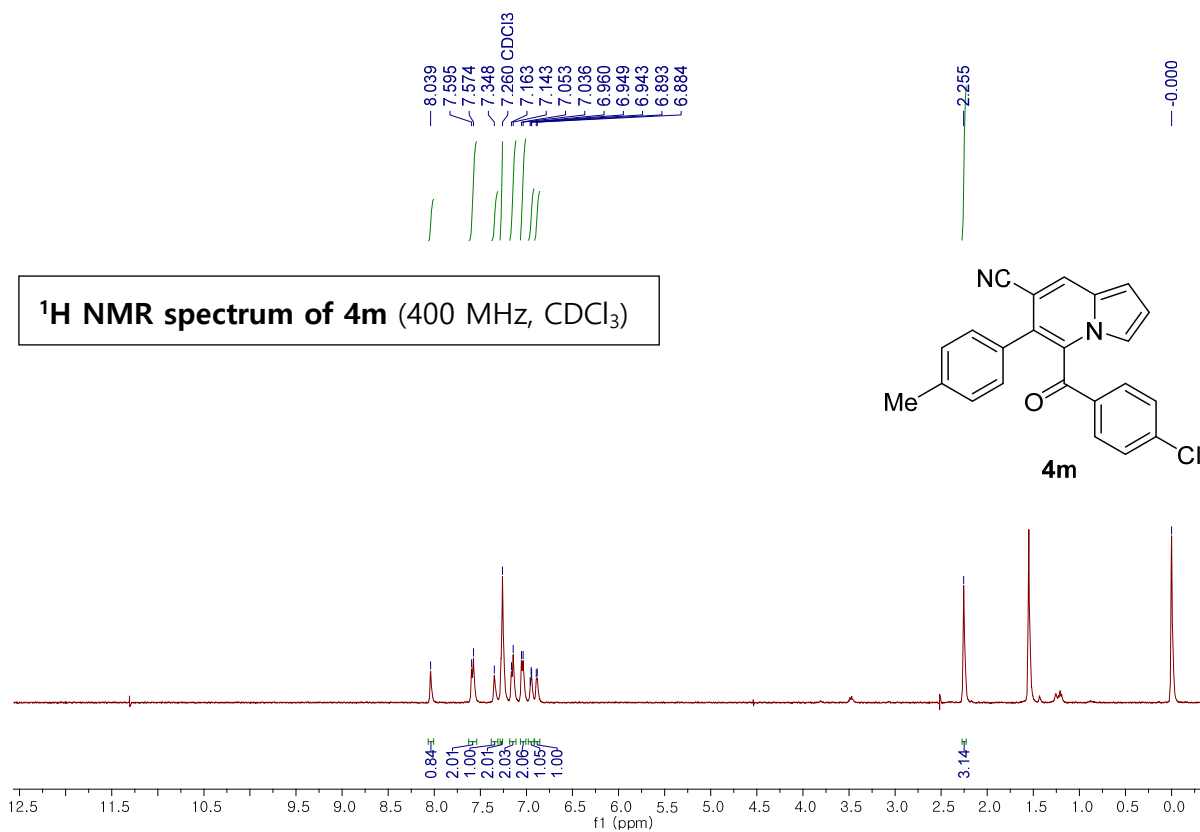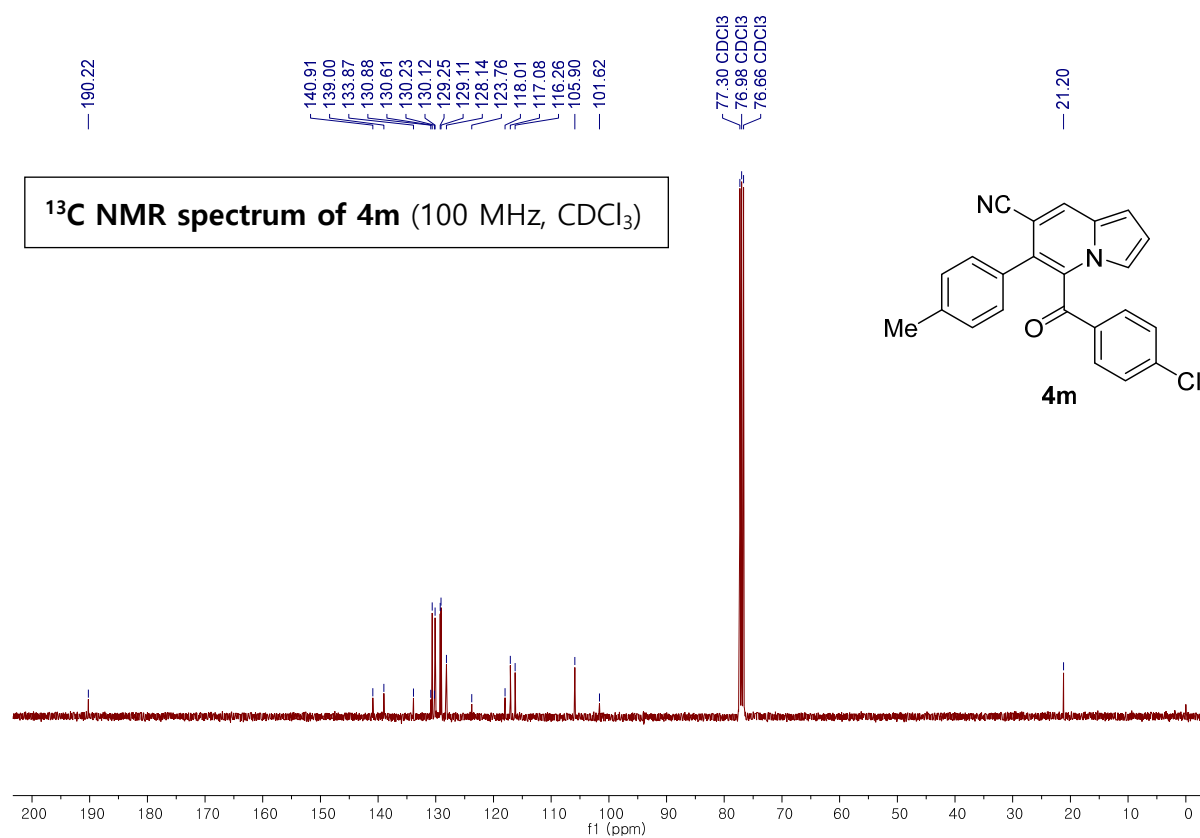



**<sup>1</sup>H NMR spectrum of 4n (400 MHz, CDCl<sub>3</sub>)**

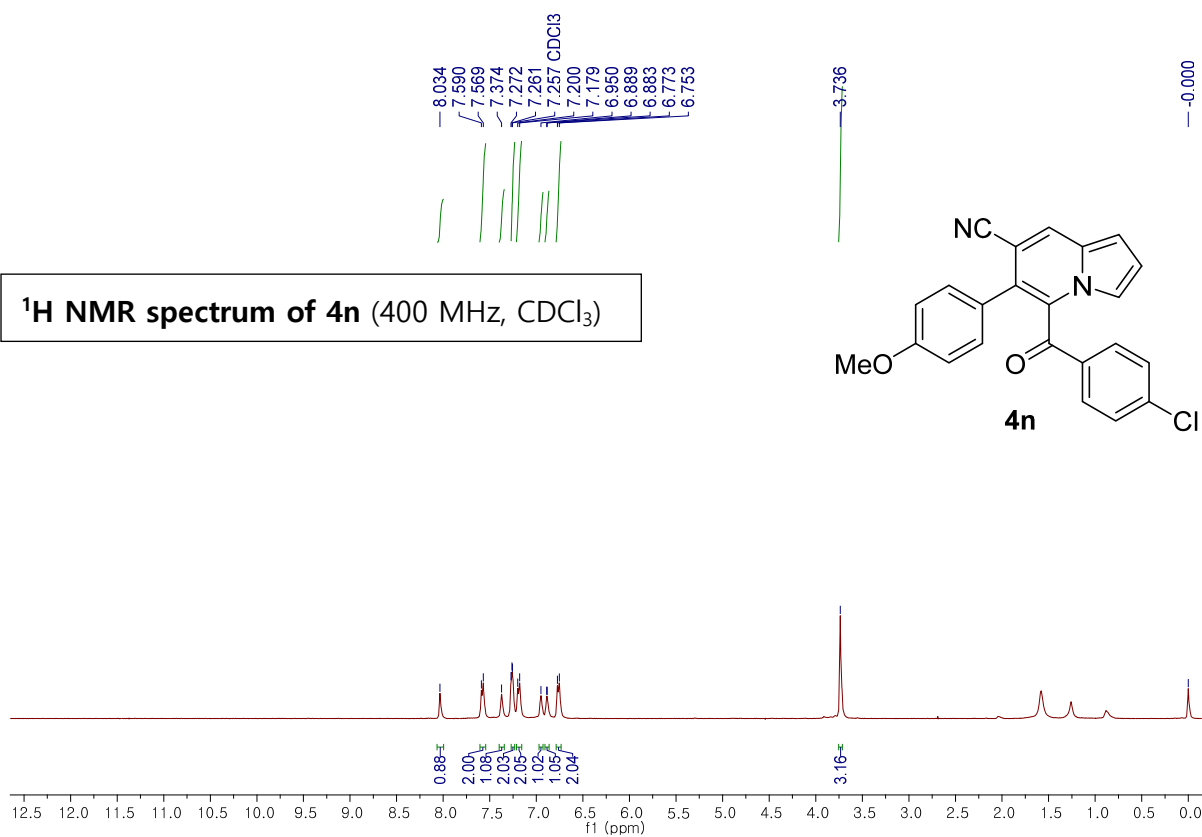

**<sup>13</sup>C NMR spectrum of 4n (100 MHz, CDCl<sub>3</sub>)**

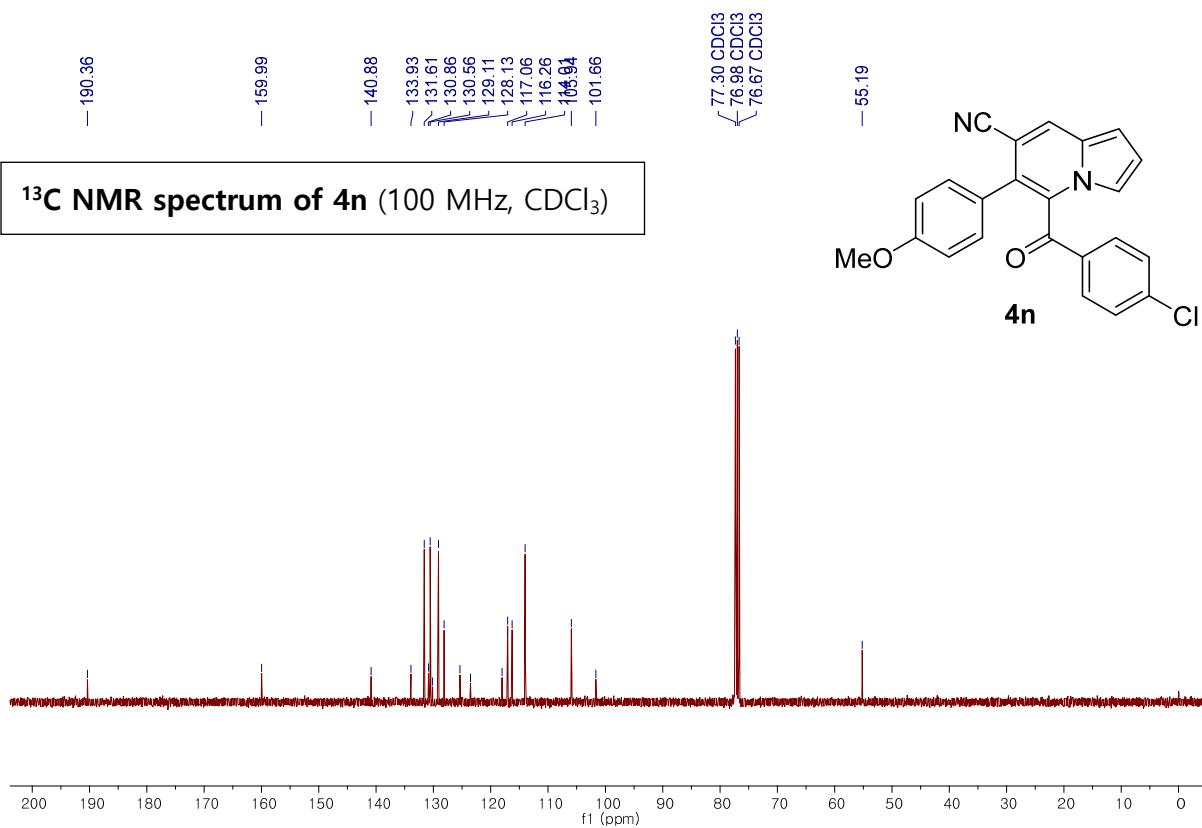

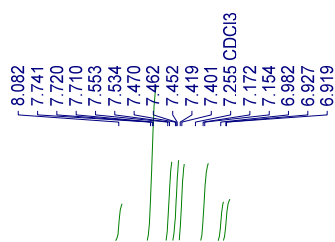

**<sup>1</sup>H NMR spectrum of 4o (400 MHz, CDCl<sub>3</sub>)**

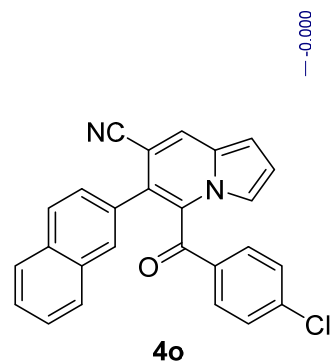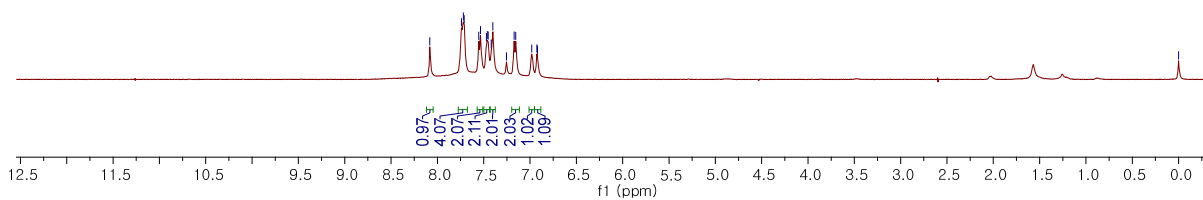

**<sup>13</sup>C NMR spectrum of 4o (100 MHz, CDCl<sub>3</sub>)**

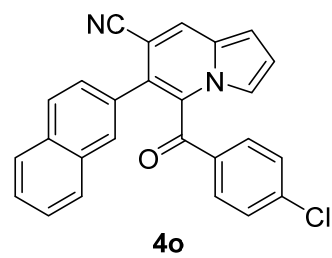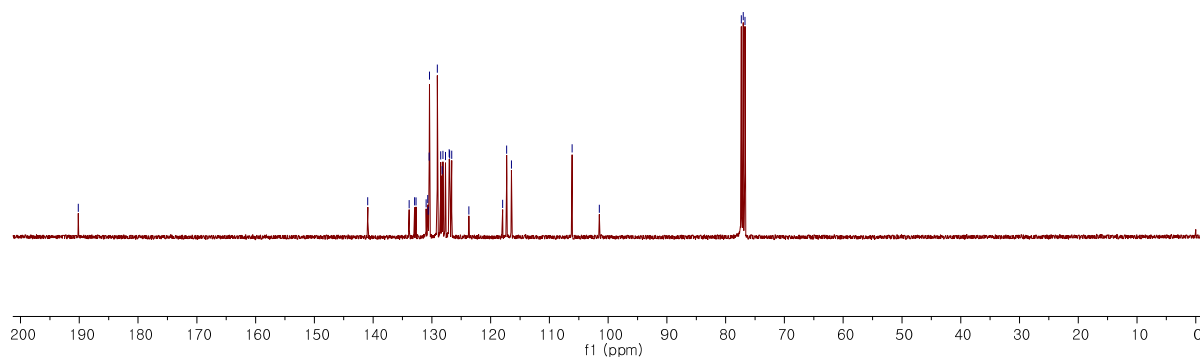

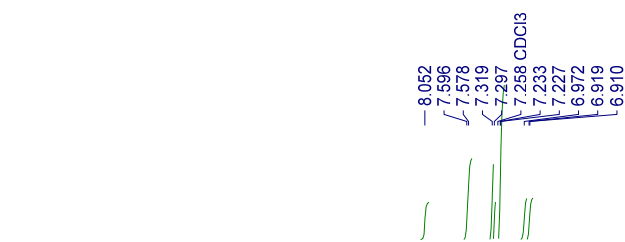

**<sup>1</sup>H NMR spectrum of 4p (400 MHz, CDCl<sub>3</sub>)**

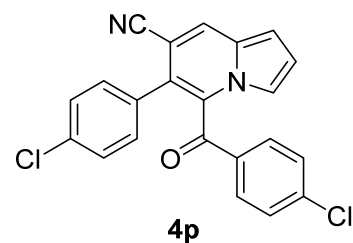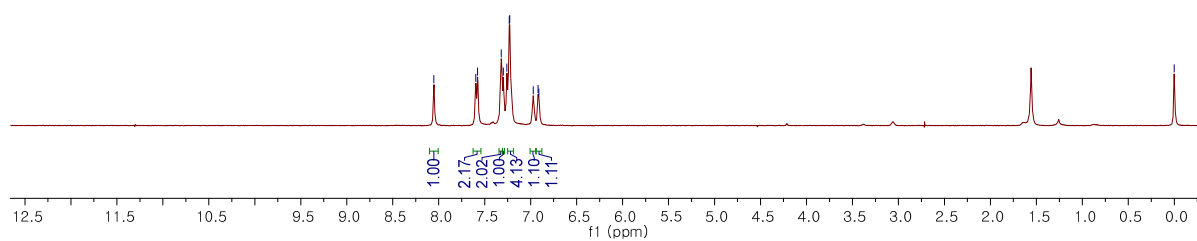

**<sup>13</sup>C NMR spectrum of 4p (100 MHz, CDCl<sub>3</sub>)**

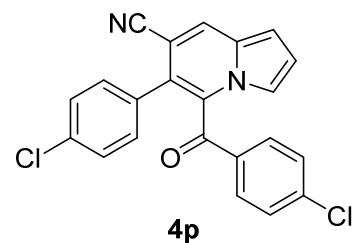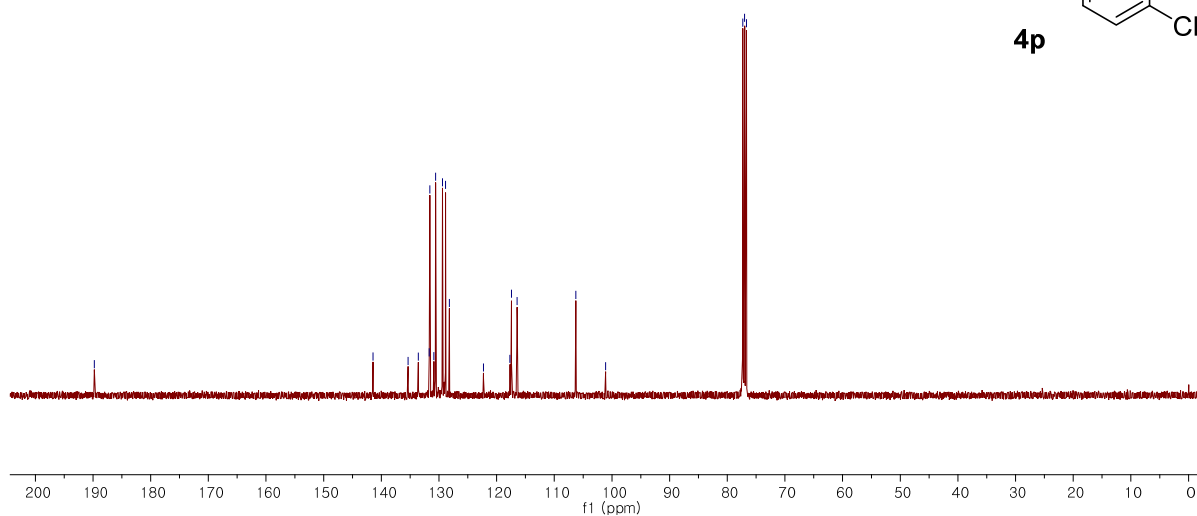

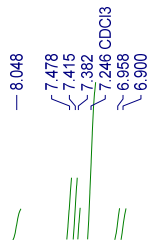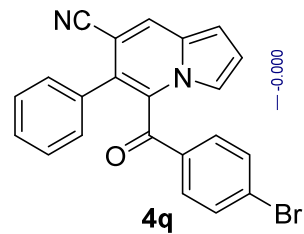

**<sup>1</sup>H NMR spectrum of 4q (400 MHz, CDCl<sub>3</sub>)**

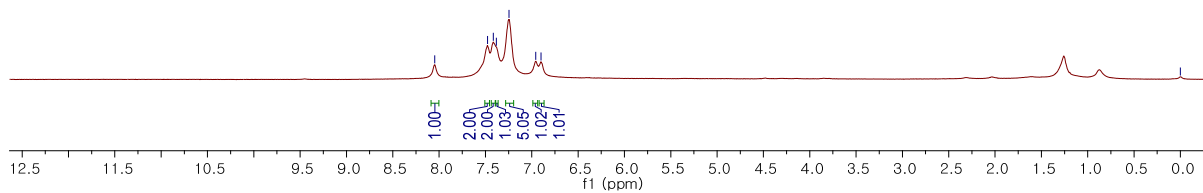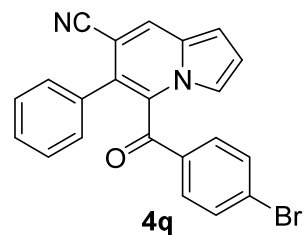

**<sup>13</sup>C NMR spectrum of 4q (100 MHz, CDCl<sub>3</sub>)**

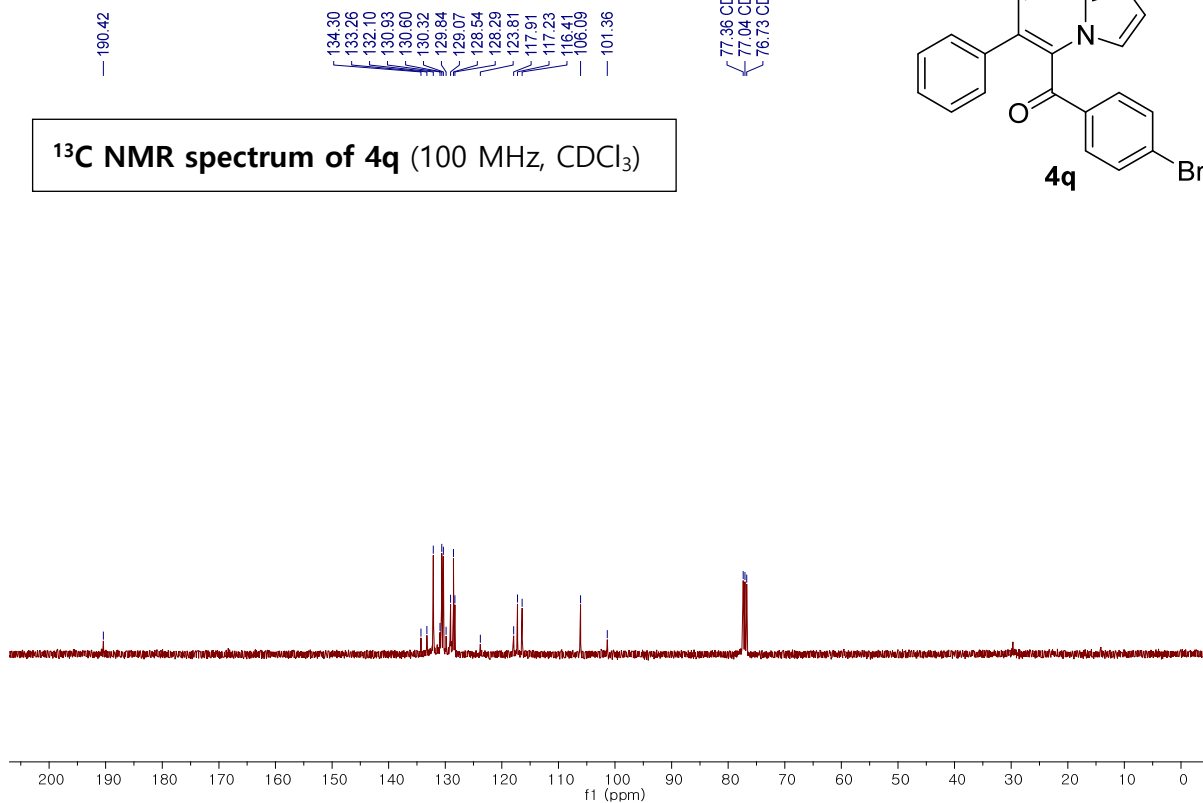

**<sup>1</sup>H NMR spectrum of 4r (400 MHz, CDCl<sub>3</sub>)**

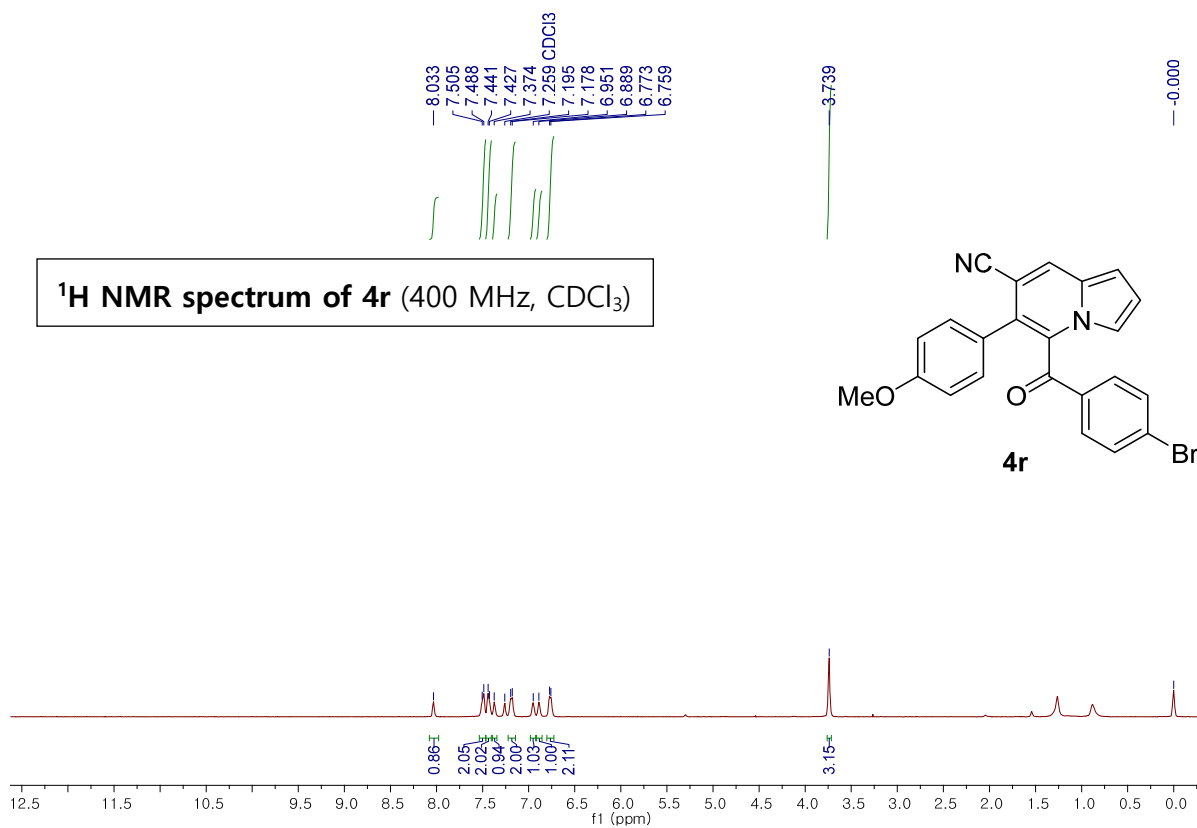

**<sup>13</sup>C NMR spectrum of 4r (100 MHz, CDCl<sub>3</sub>)**

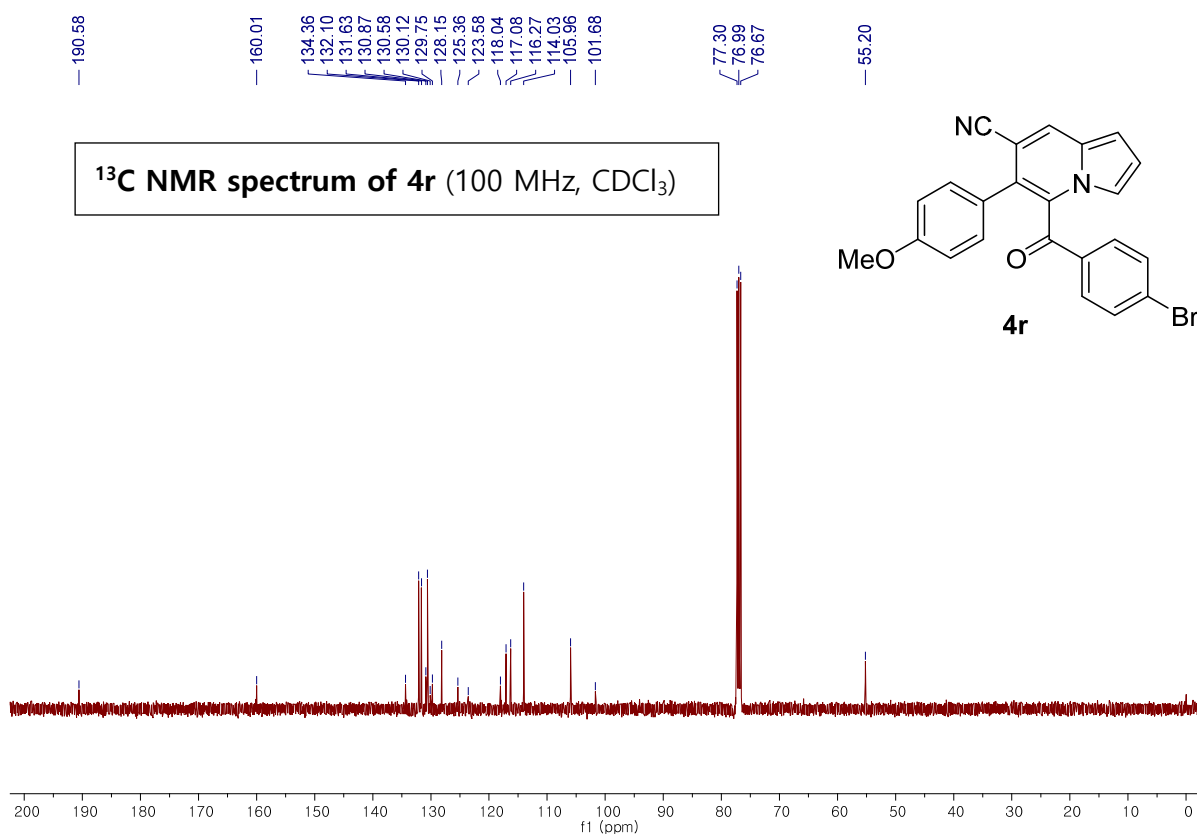

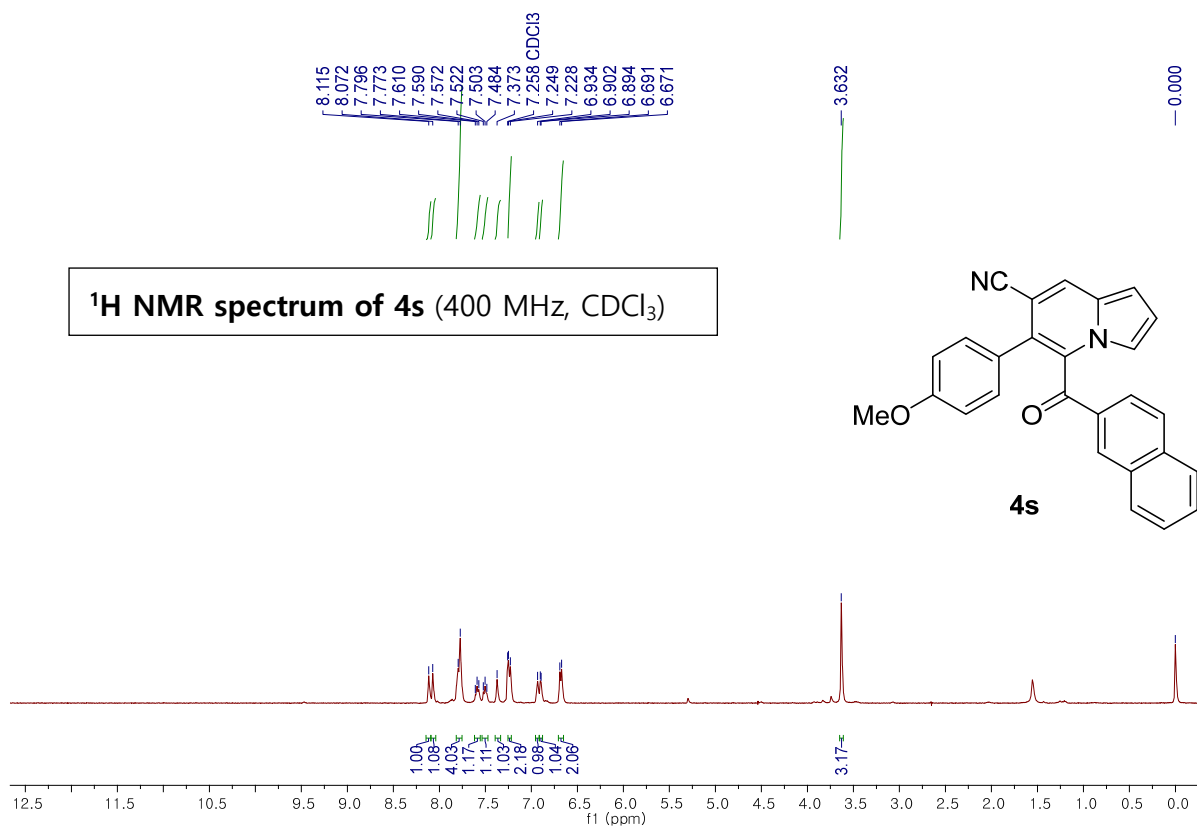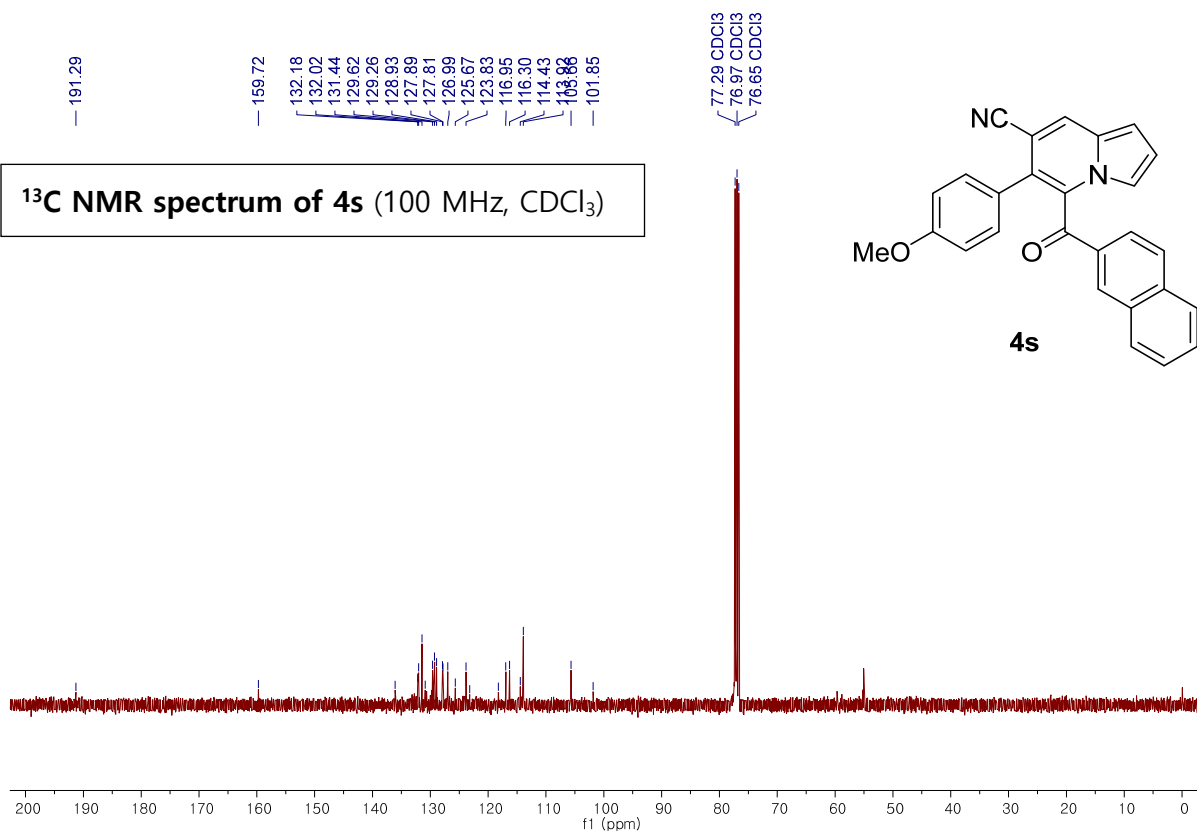

**<sup>1</sup>H NMR spectrum of 4t (400 MHz, CDCl<sub>3</sub>)**

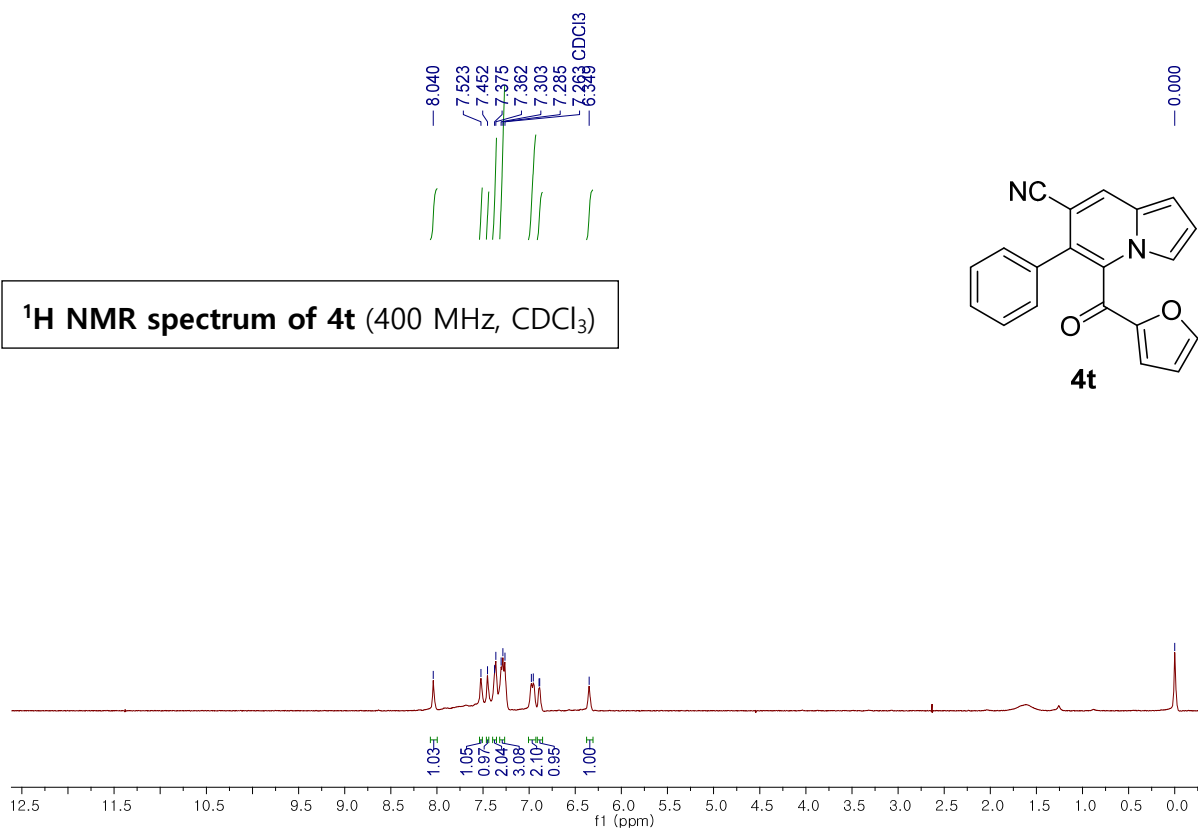

**<sup>13</sup>C NMR spectrum of 4t (100 MHz, CDCl<sub>3</sub>)**

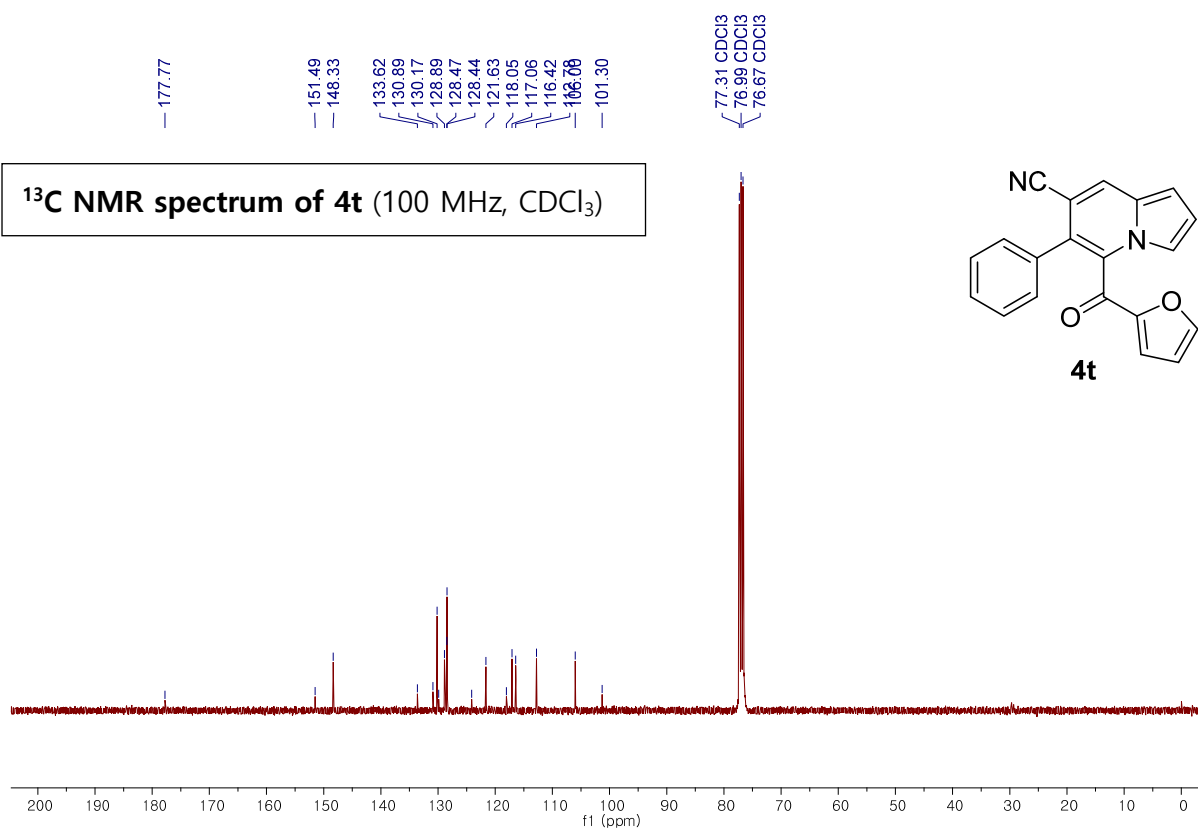

**<sup>1</sup>H NMR spectrum of 4u (400 MHz, CDCl<sub>3</sub>)**

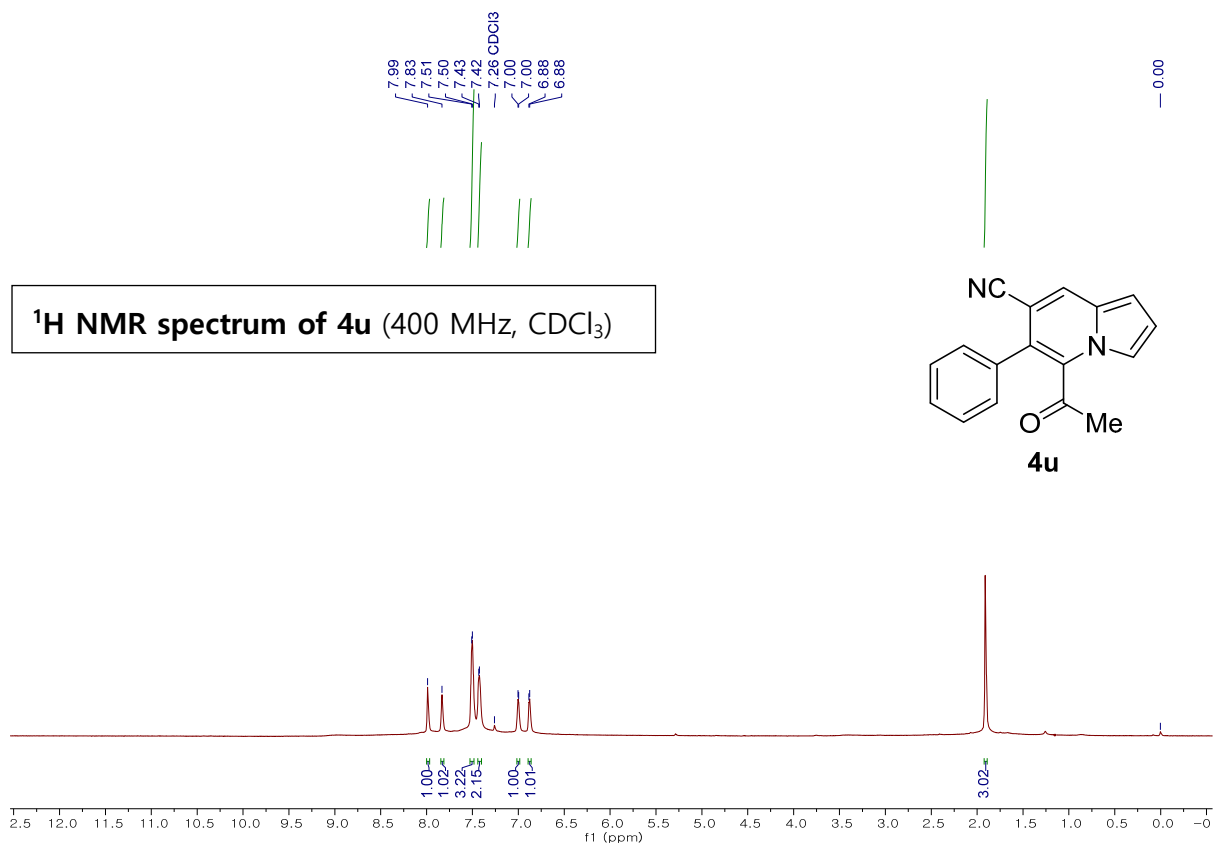

**<sup>13</sup>C NMR spectrum of 4u (100 MHz, CDCl<sub>3</sub>)**

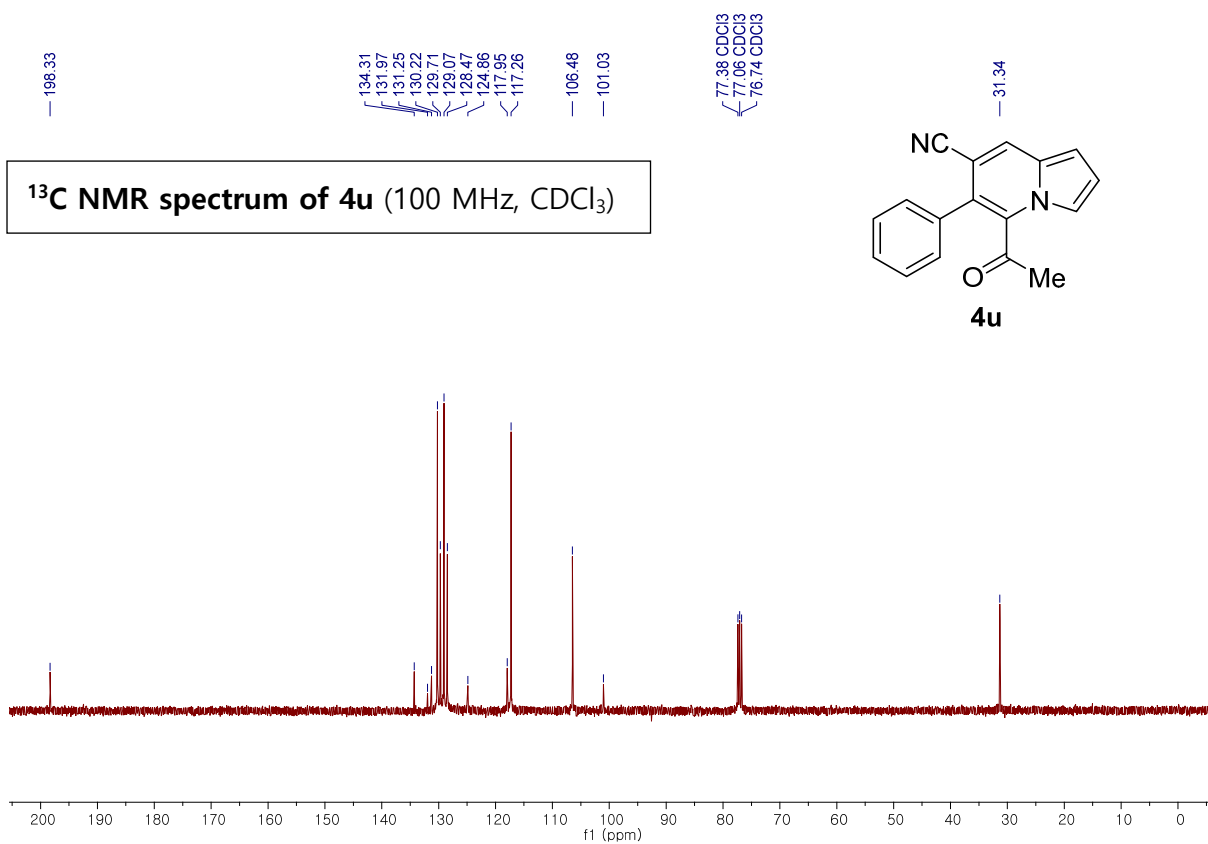



**<sup>1</sup>H NMR spectrum of 4v (400 MHz, CDCl<sub>3</sub>)**

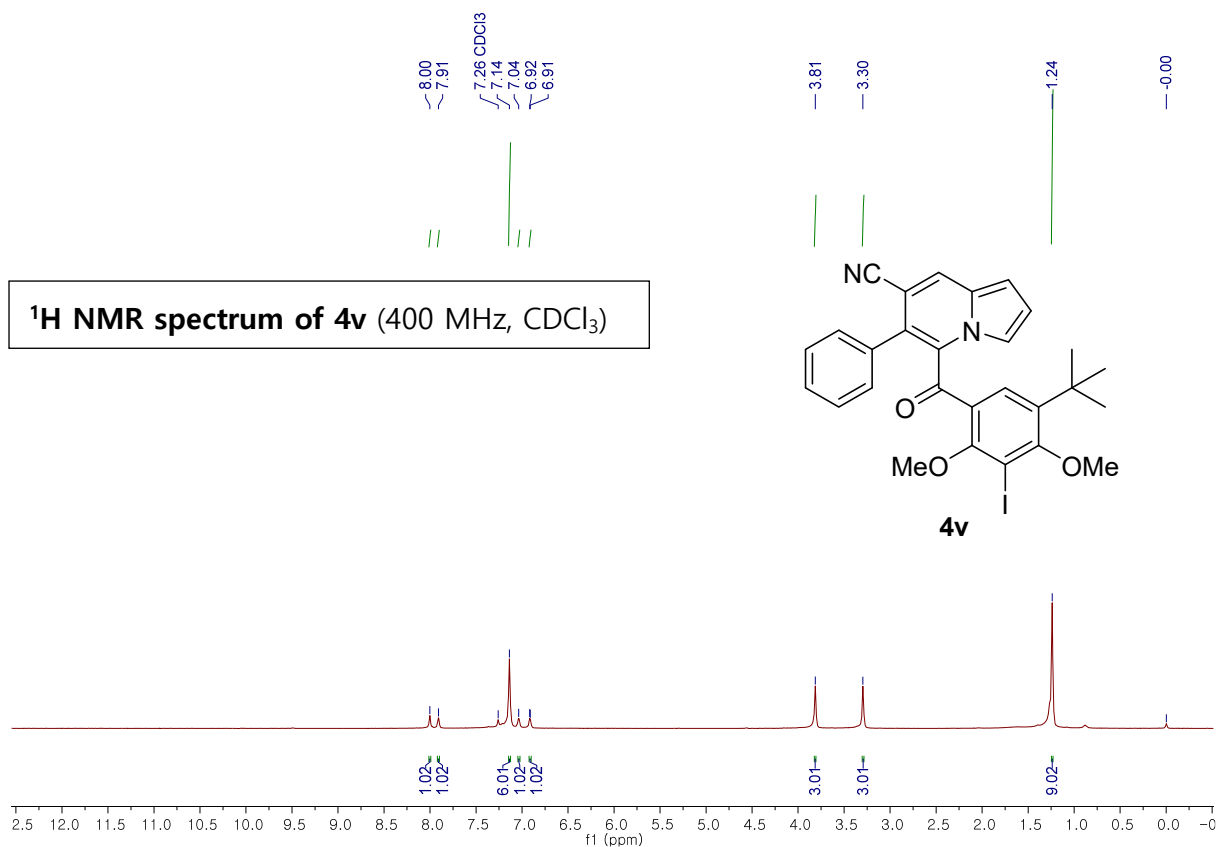

**<sup>13</sup>C NMR spectrum of 4v (100 MHz, CDCl<sub>3</sub>)**

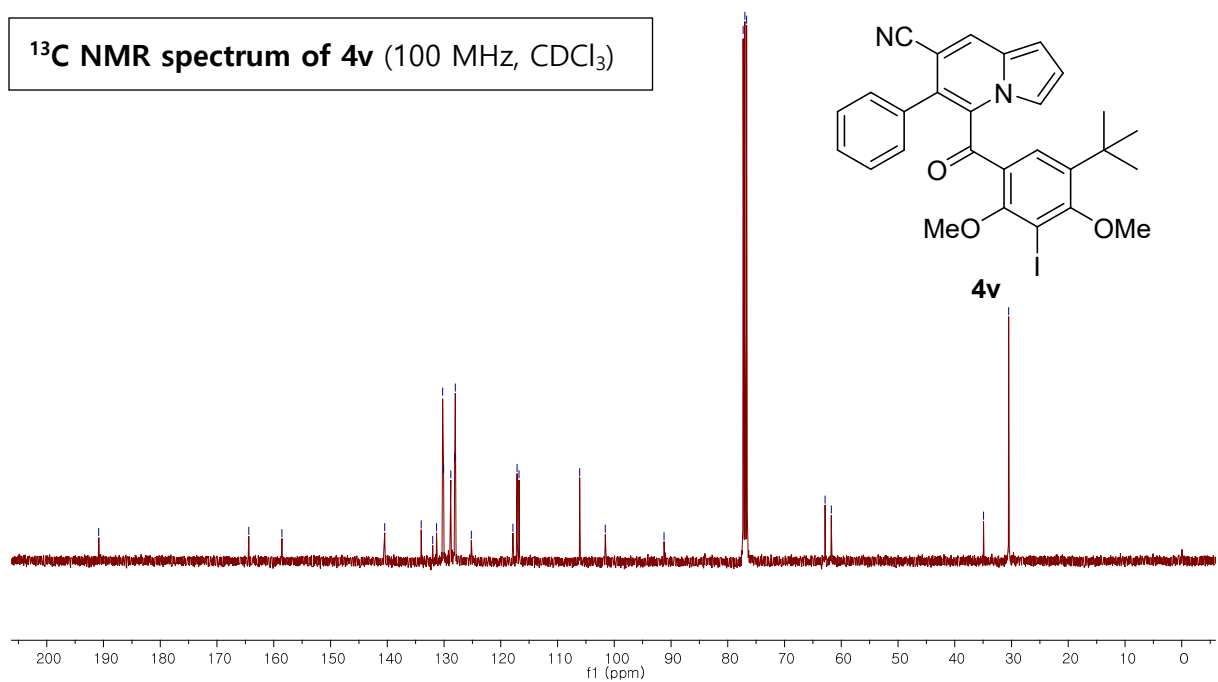

KSM-II-138

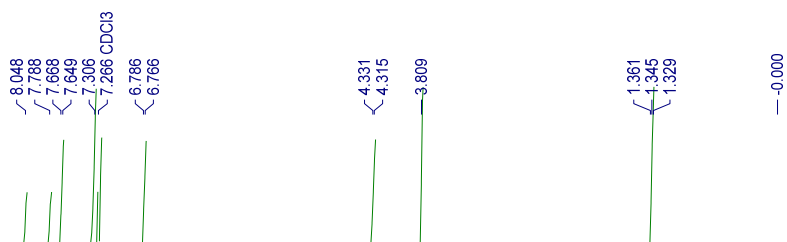

**<sup>1</sup>H NMR spectrum of 4w (400 MHz, CDCl<sub>3</sub>)**

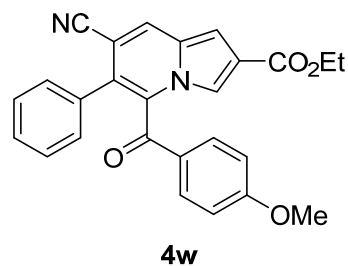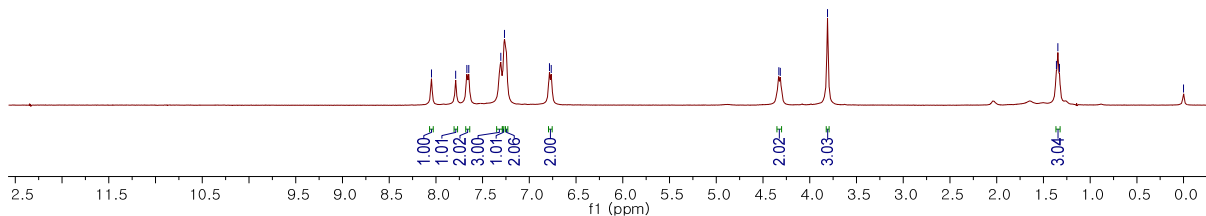

**<sup>13</sup>C NMR spectrum of 4w (100 MHz, CDCl<sub>3</sub>)**

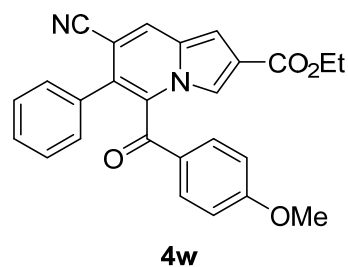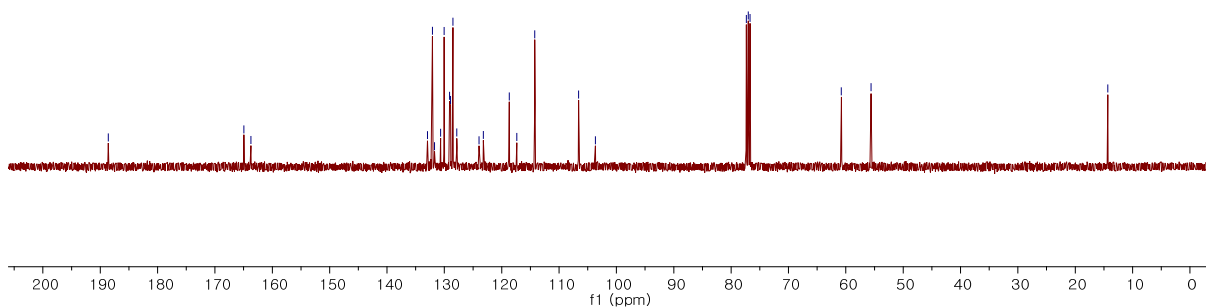

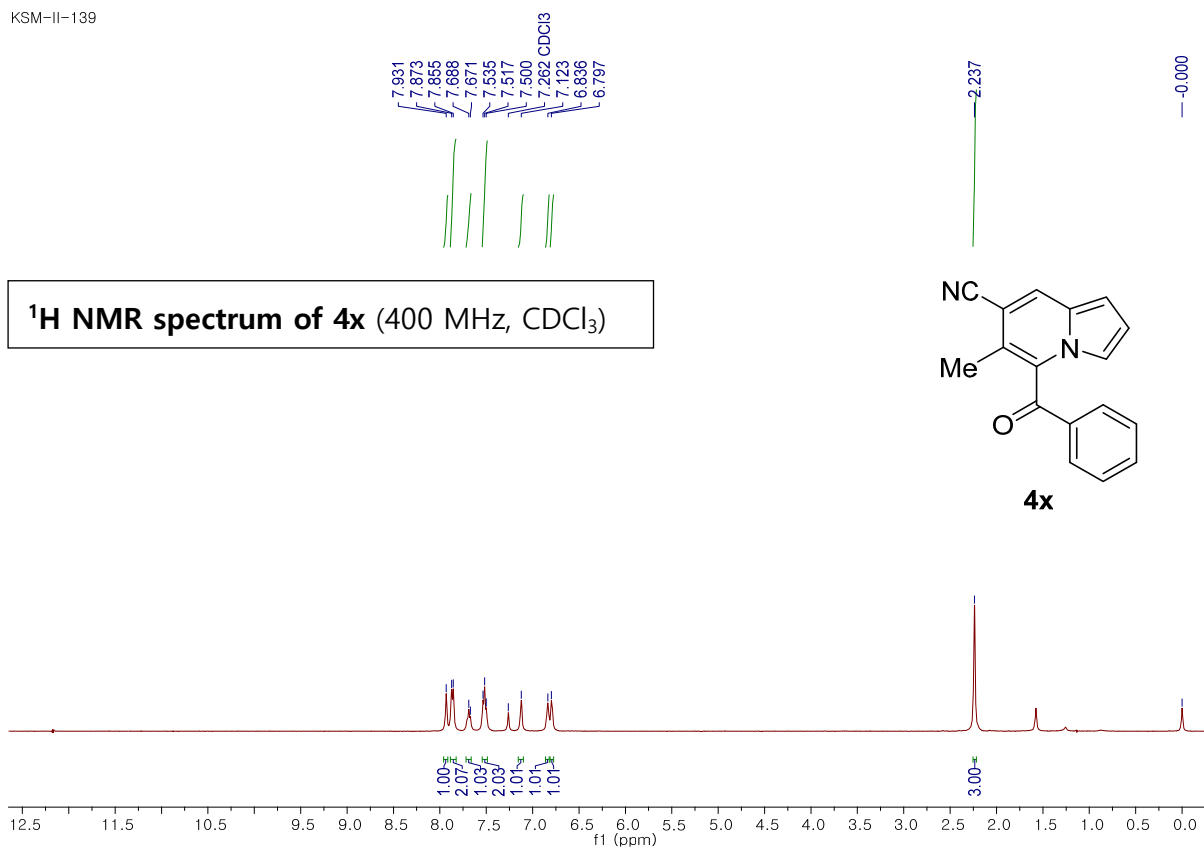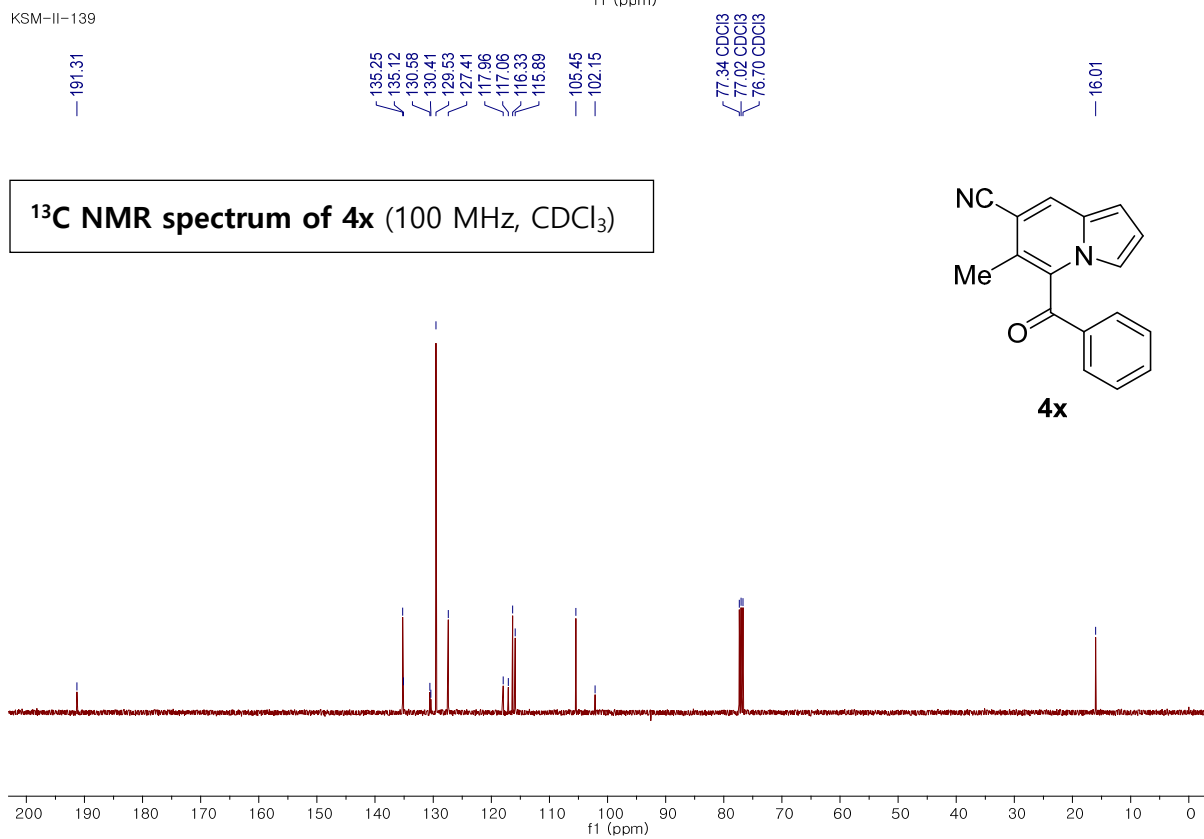

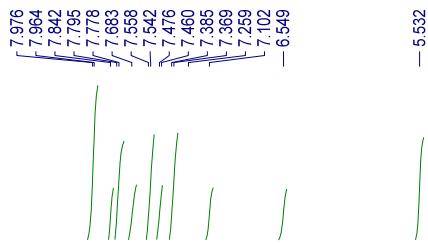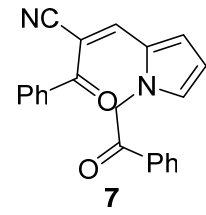

**<sup>1</sup>H NMR spectrum of 7 (400 MHz, CDCl<sub>3</sub>)**

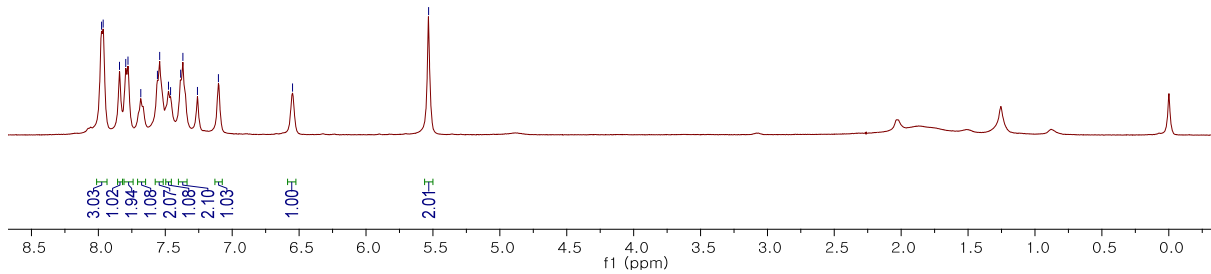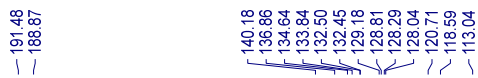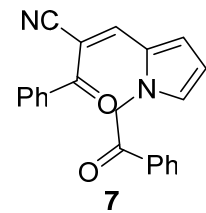

**<sup>13</sup>C NMR spectrum of 7 (100 MHz, CDCl<sub>3</sub>)**

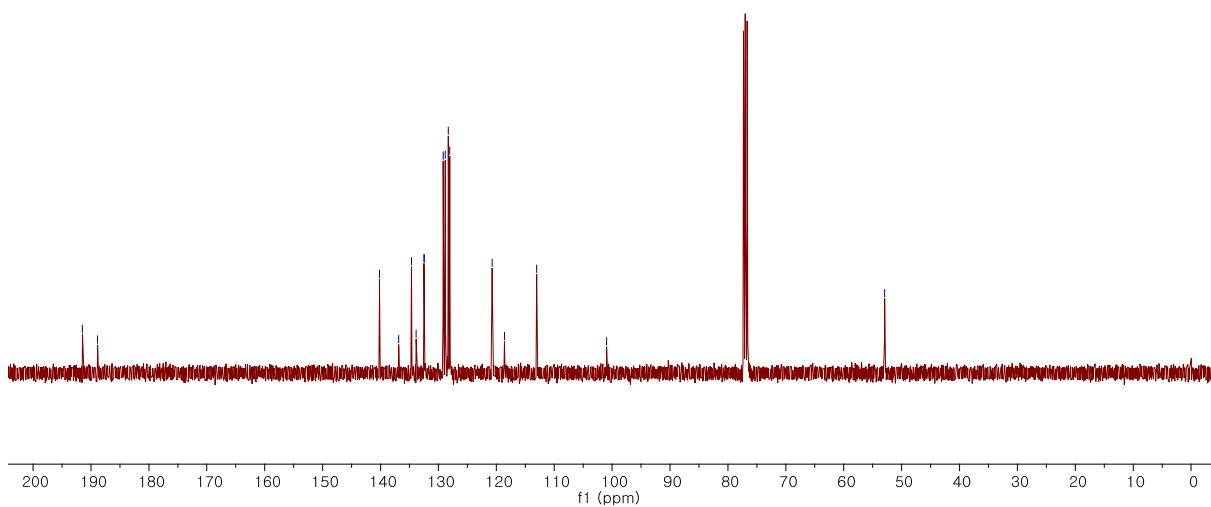

**<sup>1</sup>H NMR spectrum of 9 (400 MHz, CDCl<sub>3</sub>)**

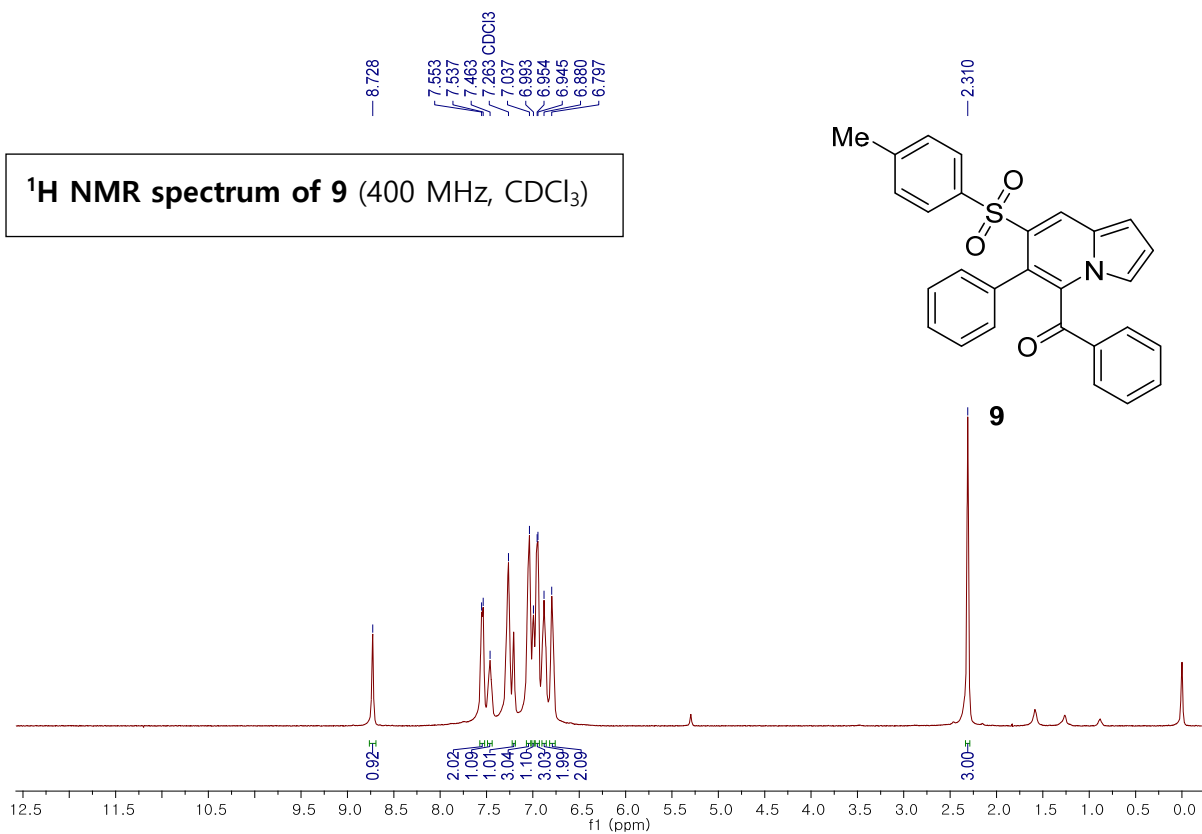

**<sup>13</sup>C NMR spectrum of 9 (100 MHz, CDCl<sub>3</sub>)**

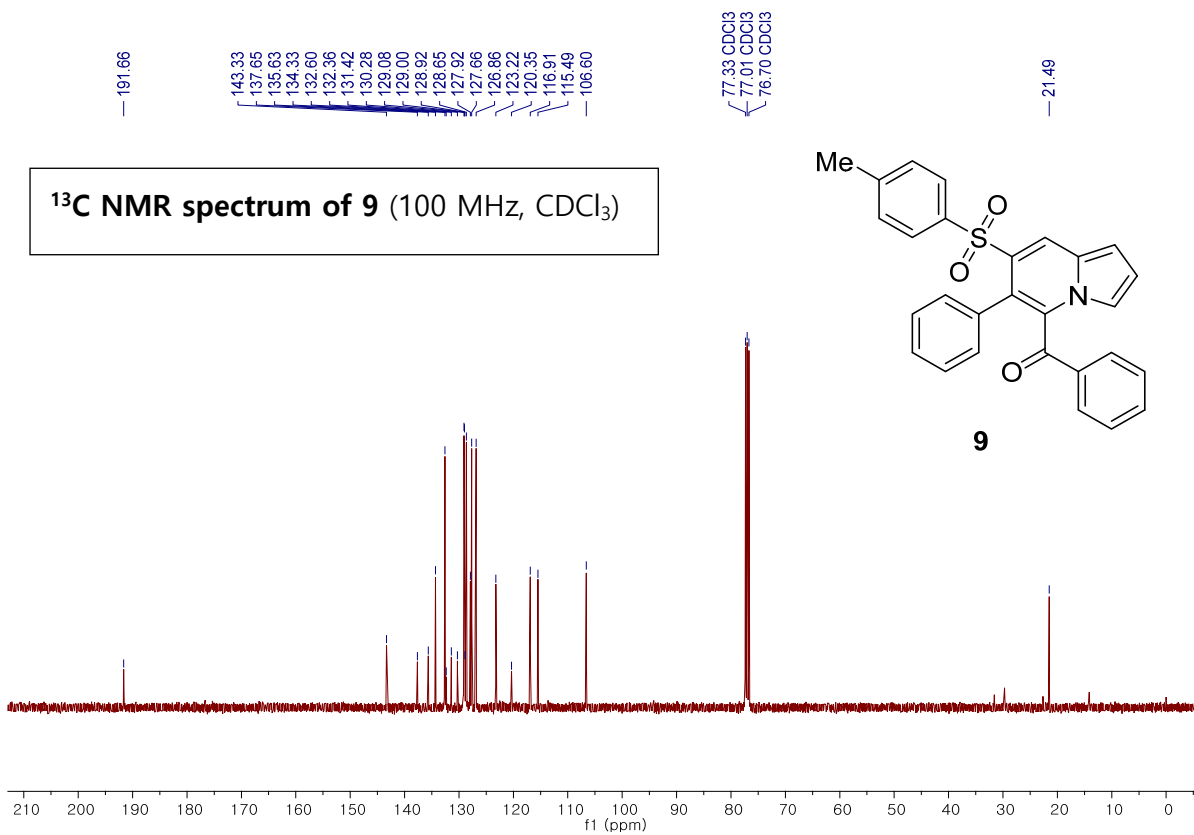

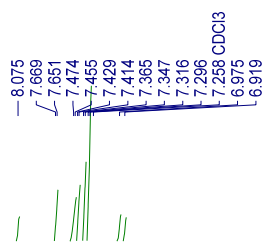

**<sup>1</sup>H NMR spectrum of 10a (400 MHz, CDCl<sub>3</sub>)**

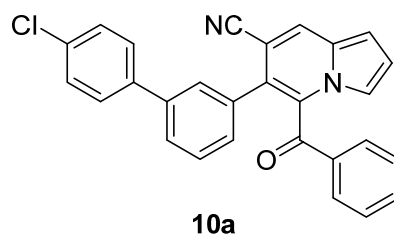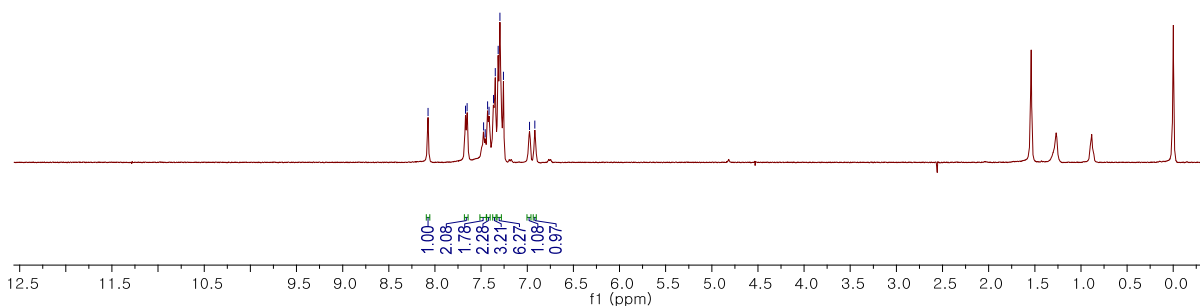

**<sup>13</sup>C NMR spectrum of 10a (100 MHz, CDCl<sub>3</sub>)**

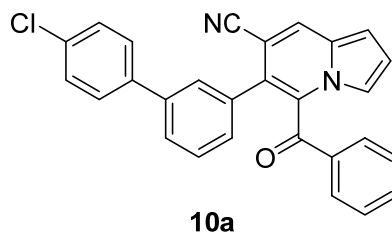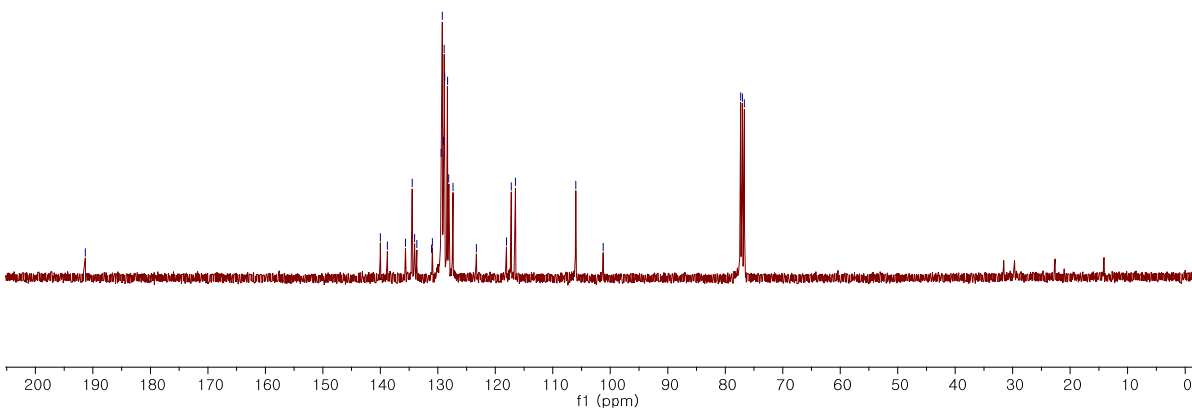

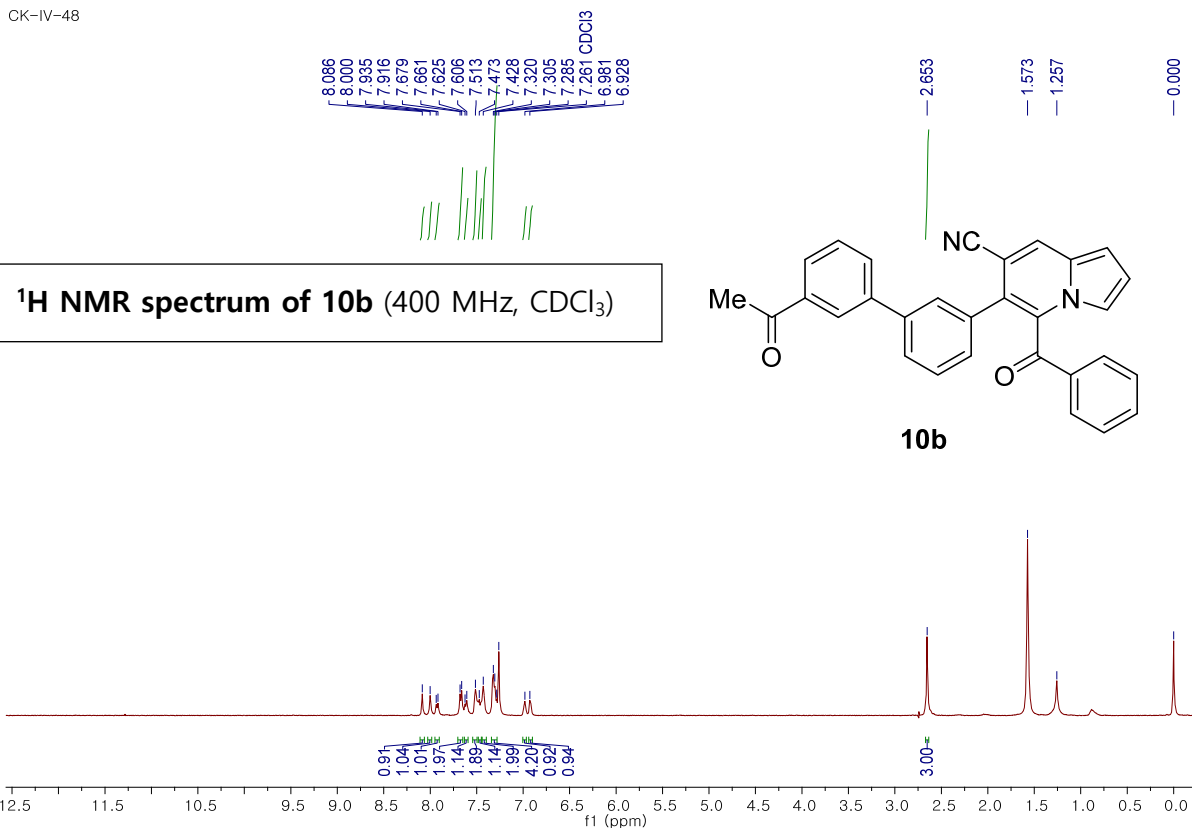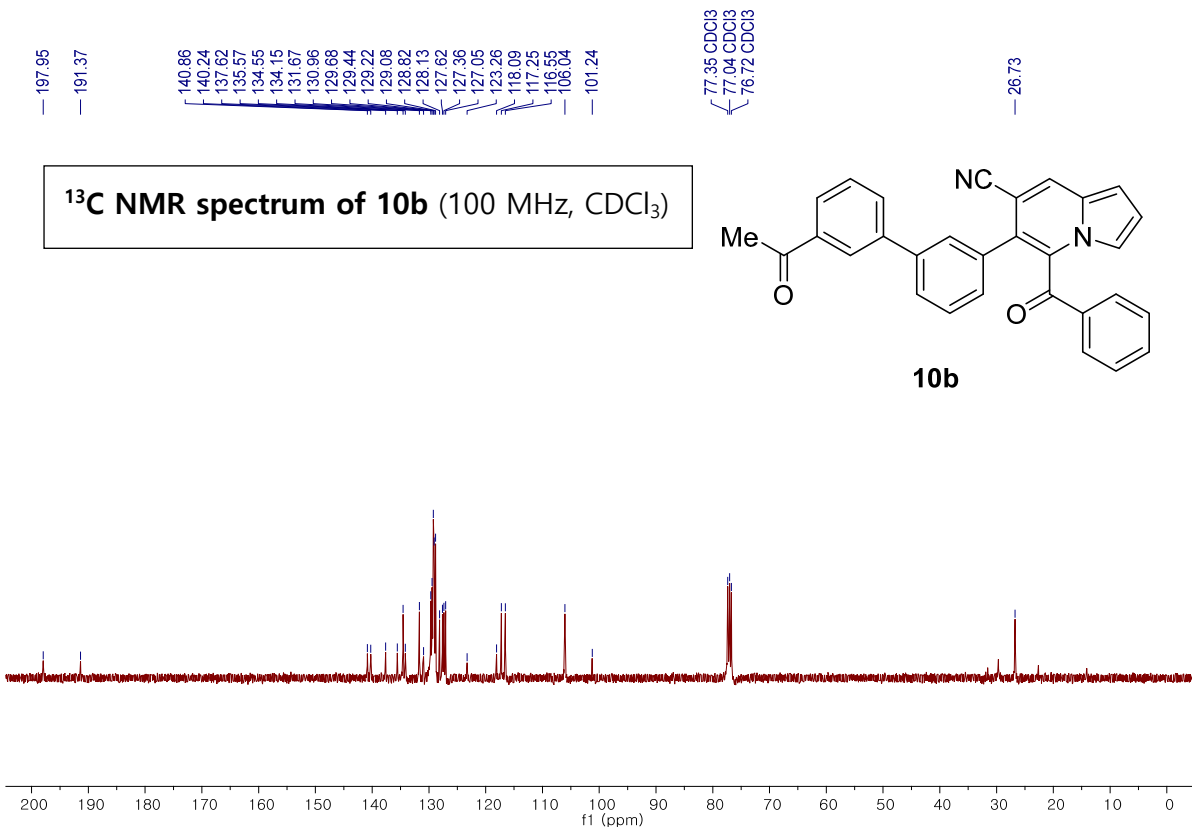

CK-IV-66

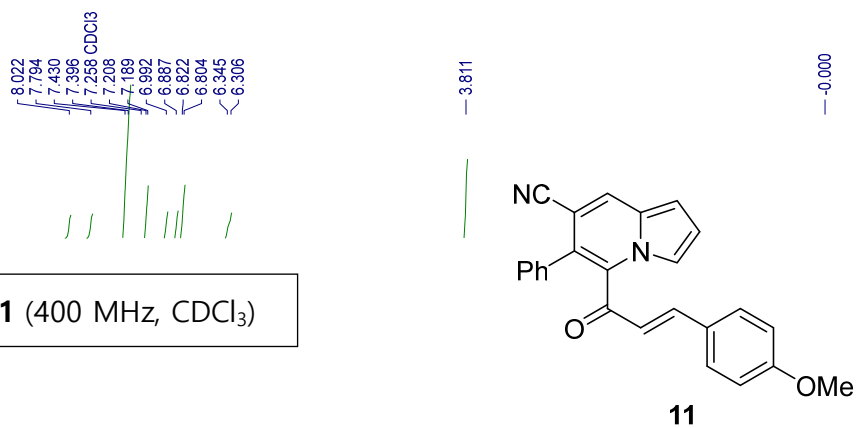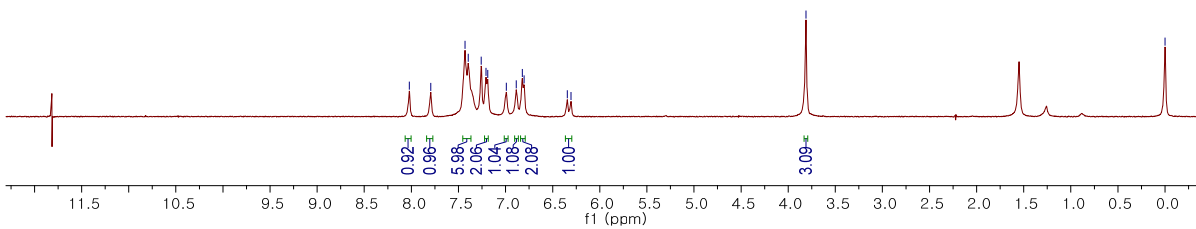

CK-IV-66C

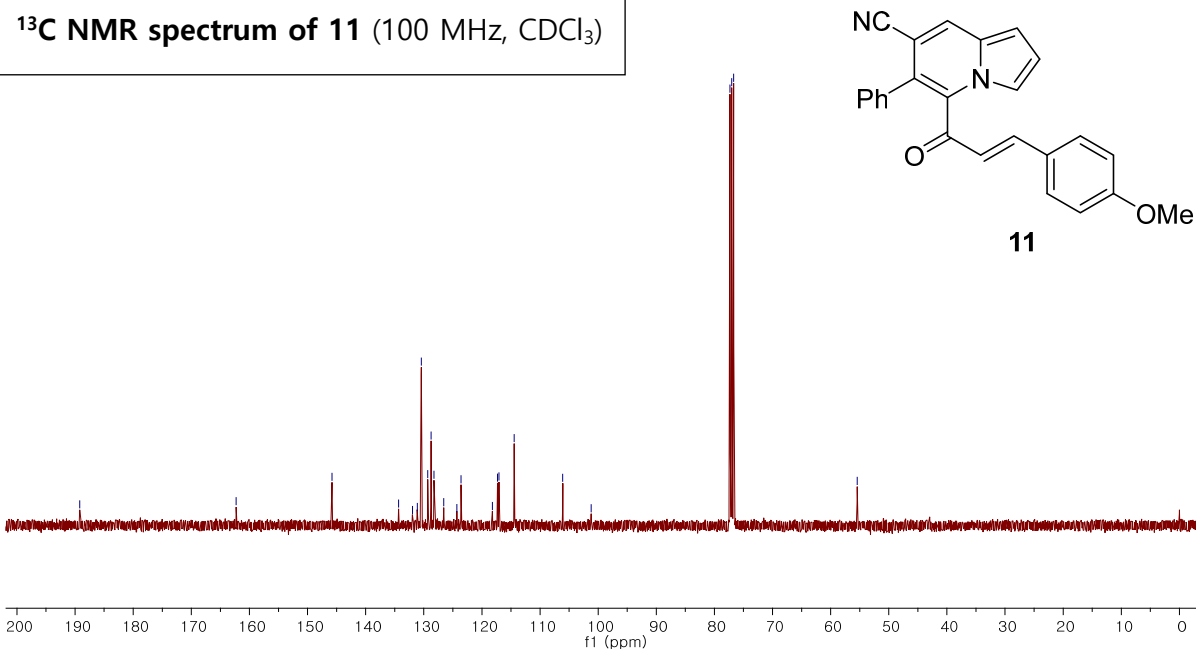



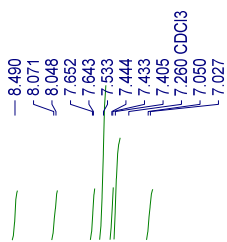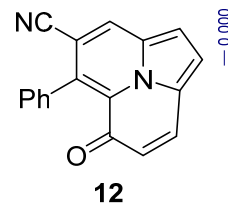

**<sup>1</sup>H NMR spectrum of 12 (400 MHz, CDCl<sub>3</sub>)**

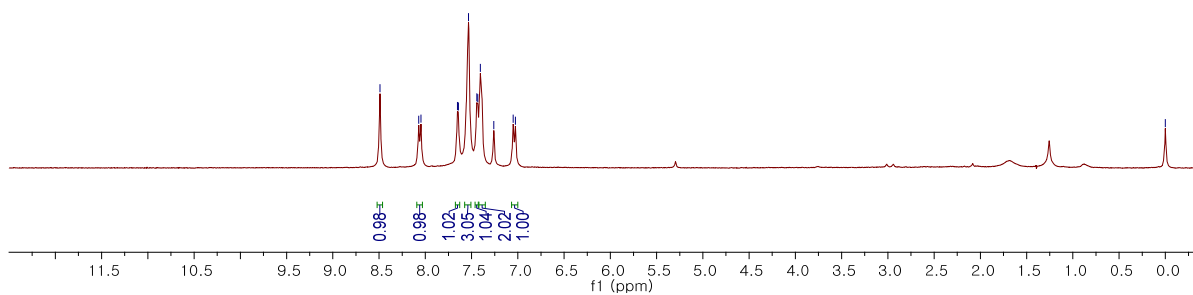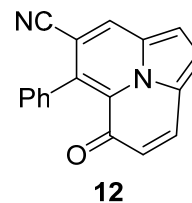

**<sup>13</sup>C NMR spectrum of 12 (100 MHz, CDCl<sub>3</sub>)**

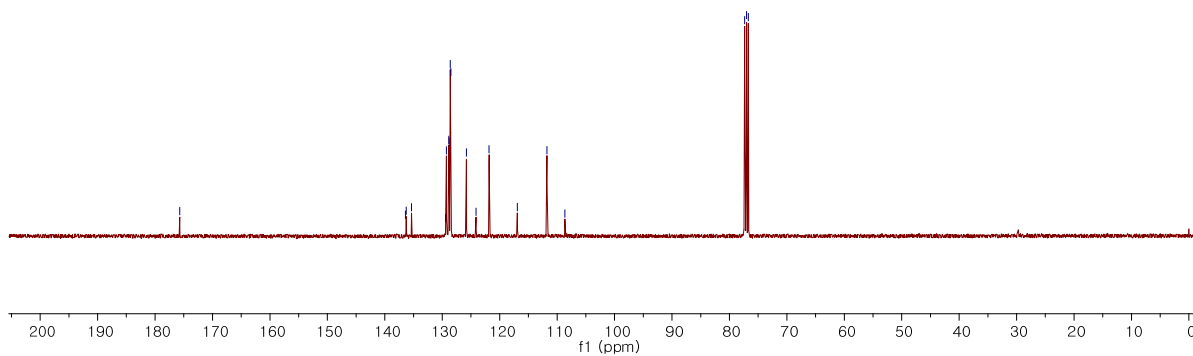

Supplement: d1ob00788b1.pdf [file d1ob00788b1.pdf]
